# Supplementary material for: Activating Free Volume of Polymeric Aggregates toward Advanced Hard Carbon for Sodium Storage
Source: Research Square preprint supplement (doi:10.21203/rs.3.rs-7799184/v1), 2025-10-31
Supplement: Supplementary file 1 [file 7e4da89693756a50fadd6ef7.docx]

**Supporting Information**

**Activating Free Volume of Polymeric Aggregates toward Advanced Hard Carbon for Sodium Storage**

Jianhao Lin1, Zhishan Liao1, Yike Liu2, Bote Zhao1, Jiexi Wang3 and Xunhui Xiong1, *

1 School of Environment and Energy, Guangdong Provincial Key Laboratory of Advanced Energy Storage Mater., South China University of Technology, Guangzhou 510006, China

2 School of Materials and Energy Engineering, Guizhou Institute of Technology, Guiyang 550003, China

3 Engineering Research Center of the Ministry of Education for Advanced Battery Materials, Hunan Provincial Key Laboratory of Nonferrous Value-Added Metallurgy, School of Metallurgy and Environment, Central South University, Changsha 410083, China

E-mail: esxxiong@scut.edu.cn

**1. Correlated Calculations**

**Swelling ratio** (ΔS/S0)**:** the change in the upper area (ΔS) with the respect to the original upper area (S0).

ΔS/S0 (%) = (S1- S0)/S0 Equation S1


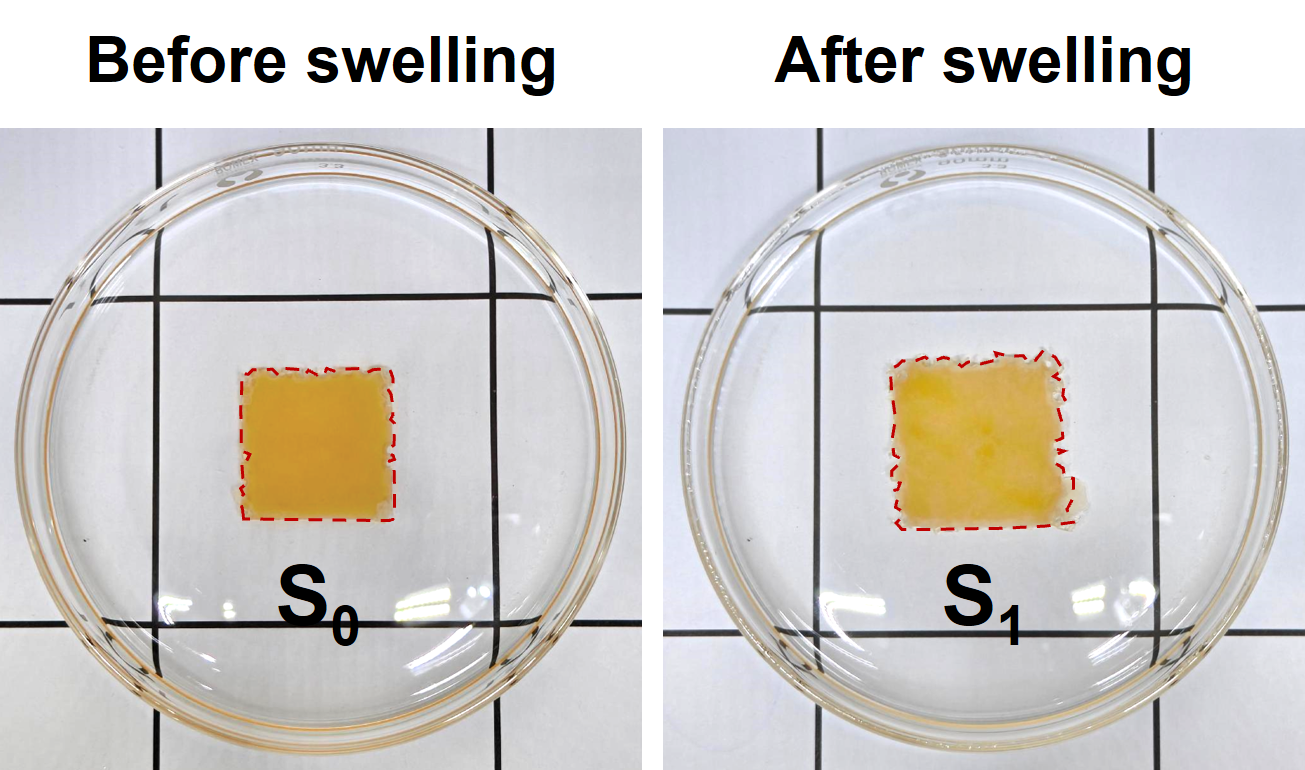


in which S0 is upper area before swelling and S1 is upper area after swelling calculated by Photoshop software.

**Interlayer spacing (d002):** d002 is calculated using Bragg’s equation:

Equation S2

in which **n**=1(order of diffraction)

**λ** is the XRD wavelength (Cu Kα radiation,1.54056 Å)

**θ** is the scattering angle (002) peak

**Tensile stress (σ, Pa), Tensile strain (ɛ, %) and Tensile Modulus (E, Pa)** was calculated using the following equation:

σ = F/S Equation S3

ɛ=Δ*l*/*l*0 Equation S4

E=σ/ɛ Equation S5

where S is the cross-sectional area of PPR or PR samples (m2), F is load (N), Δ*l* is the change in the length (m) and *l*0 is the gauge length of PPR or PR samples (m).

**Shrinkage ratio** (Δ*l*/*l*0) of PPR and PR during the carbonization process:

Δ*l*/*l*0 (%) = (*l*1-*l*0)/ *l*0 Equation S6

where *l*1 is the side length after carbonization and *l*0 is the original side length.

**Closed pore volume** (Vclosed pore**,** cm3 g-1) was calculated from true density (ρtrue) according to the following equation:

Vclosed pore = 1/ρtrue-1/2.26 Equation S7

**Na+ diffusion coefficients** were calculated using Fick’s second law:

Equation S8

where τ (s) is the pulse duration

mB (g) is active mass of the electrode

VM (cm3 mol-1) is molar volume

MB (g mol-1) is active mass of the el molecular weight

S (m2 g-1) is active surface area of the electrode

∆Es and ∆Eτ are obtained from the GITT curves.

**The average distance between adjacent crystalline domains** wascalculated by Bragg equation:

d=2π/qmax Equation S9

in which qmax is the scattering vector at the peak position in SAXS curve.

**Falling steel ball test:** the PPR-S or PPR-W pieces was covered on a glass substrate, and the impact process was mimicked by dropping a 50 g steel ball above the samples from the same height of about 1 m.

**2. Additional Figures and Tables**


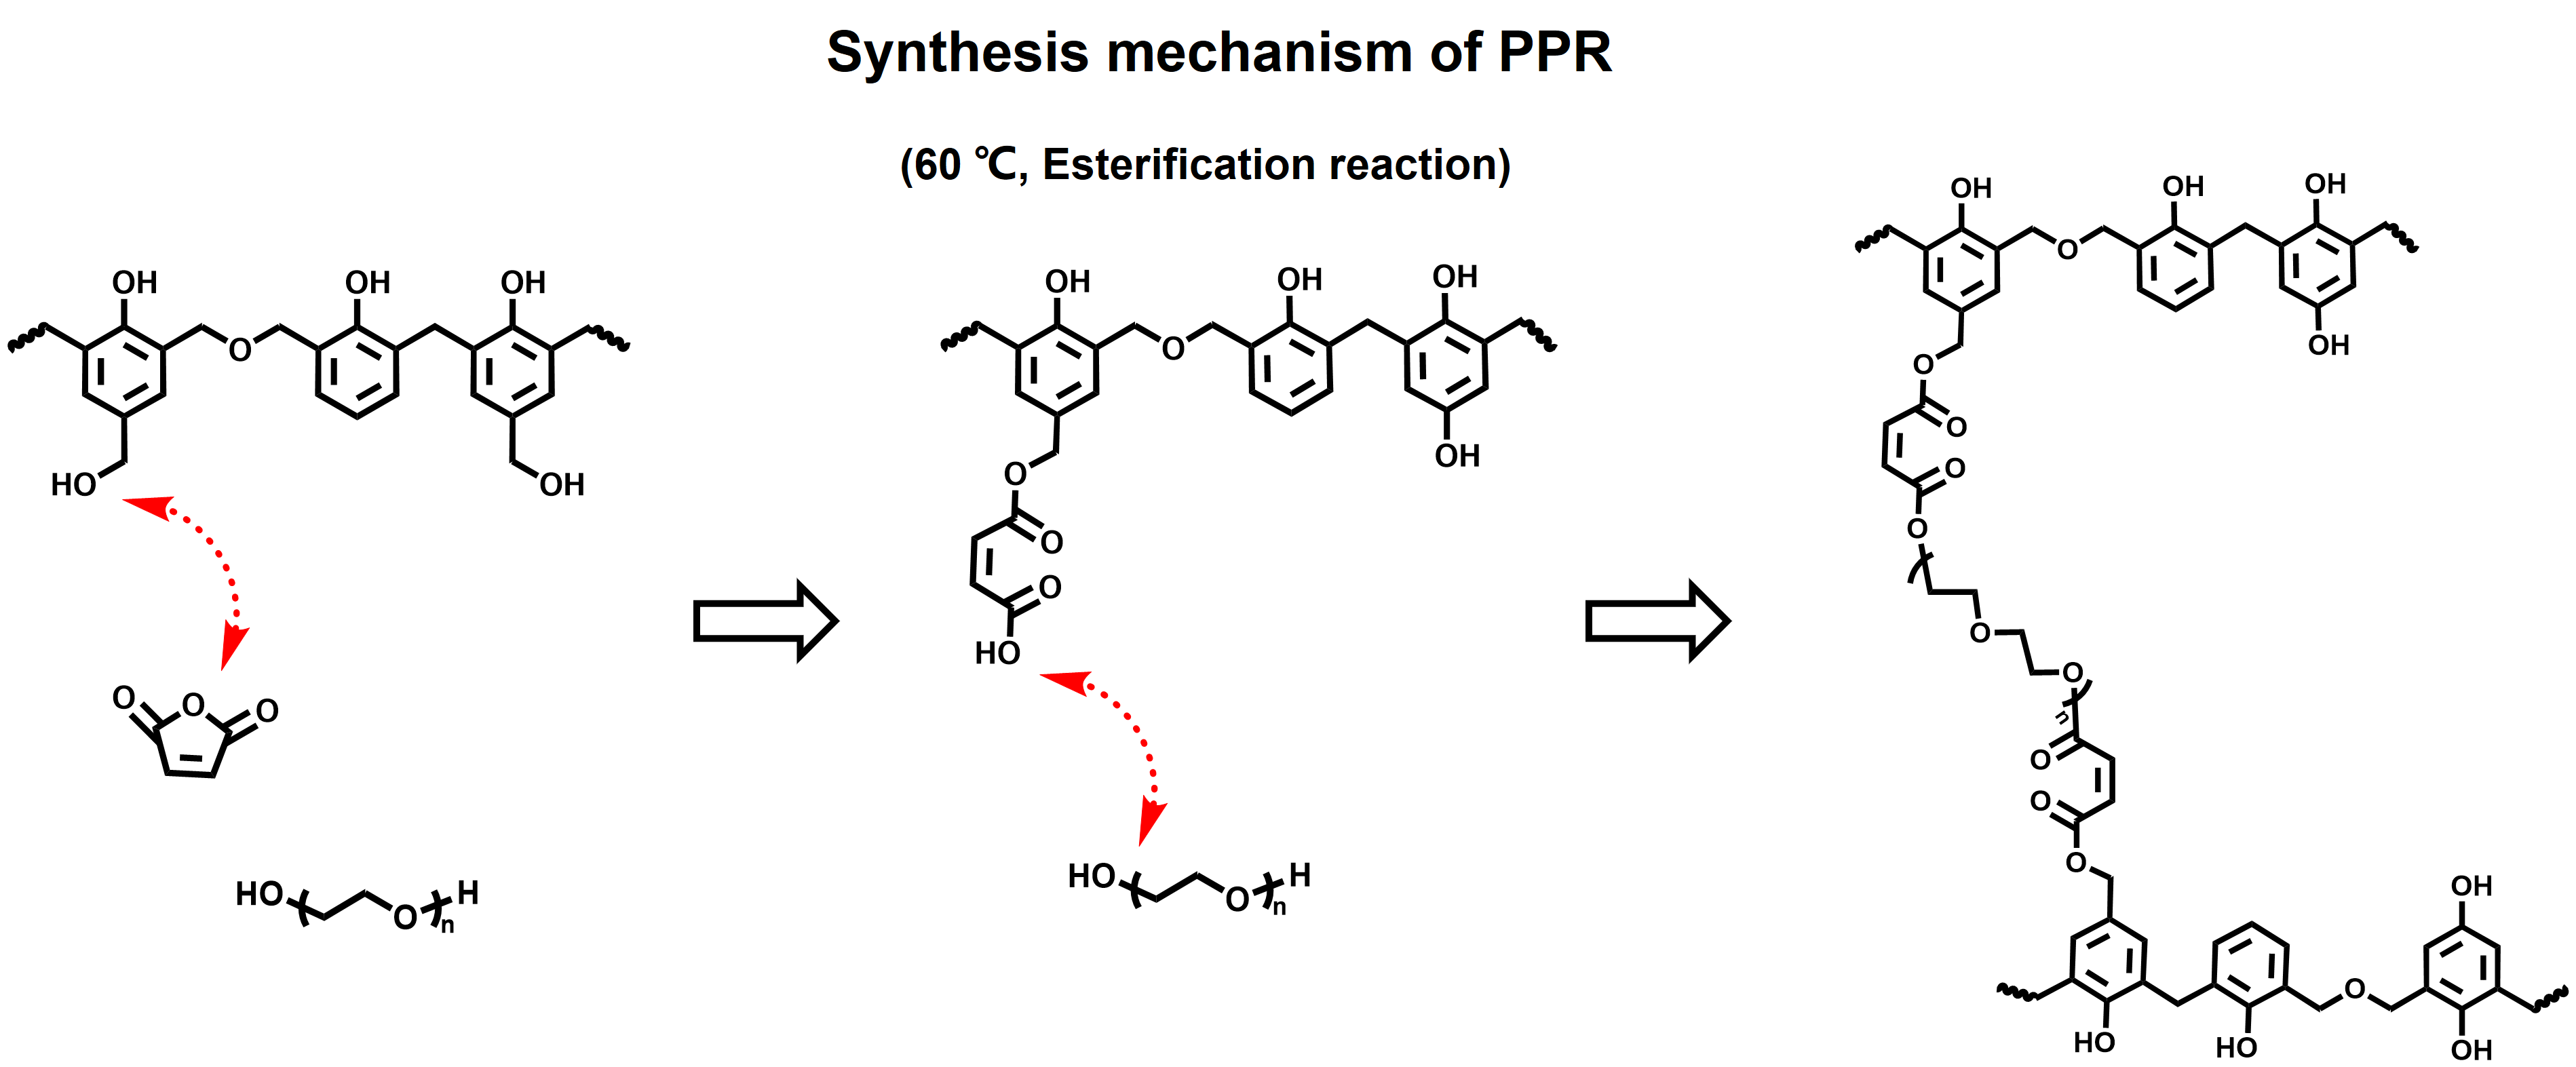


**Supplementary Fig. 1** Scheme of reaction mechanism of PPR aggregates.


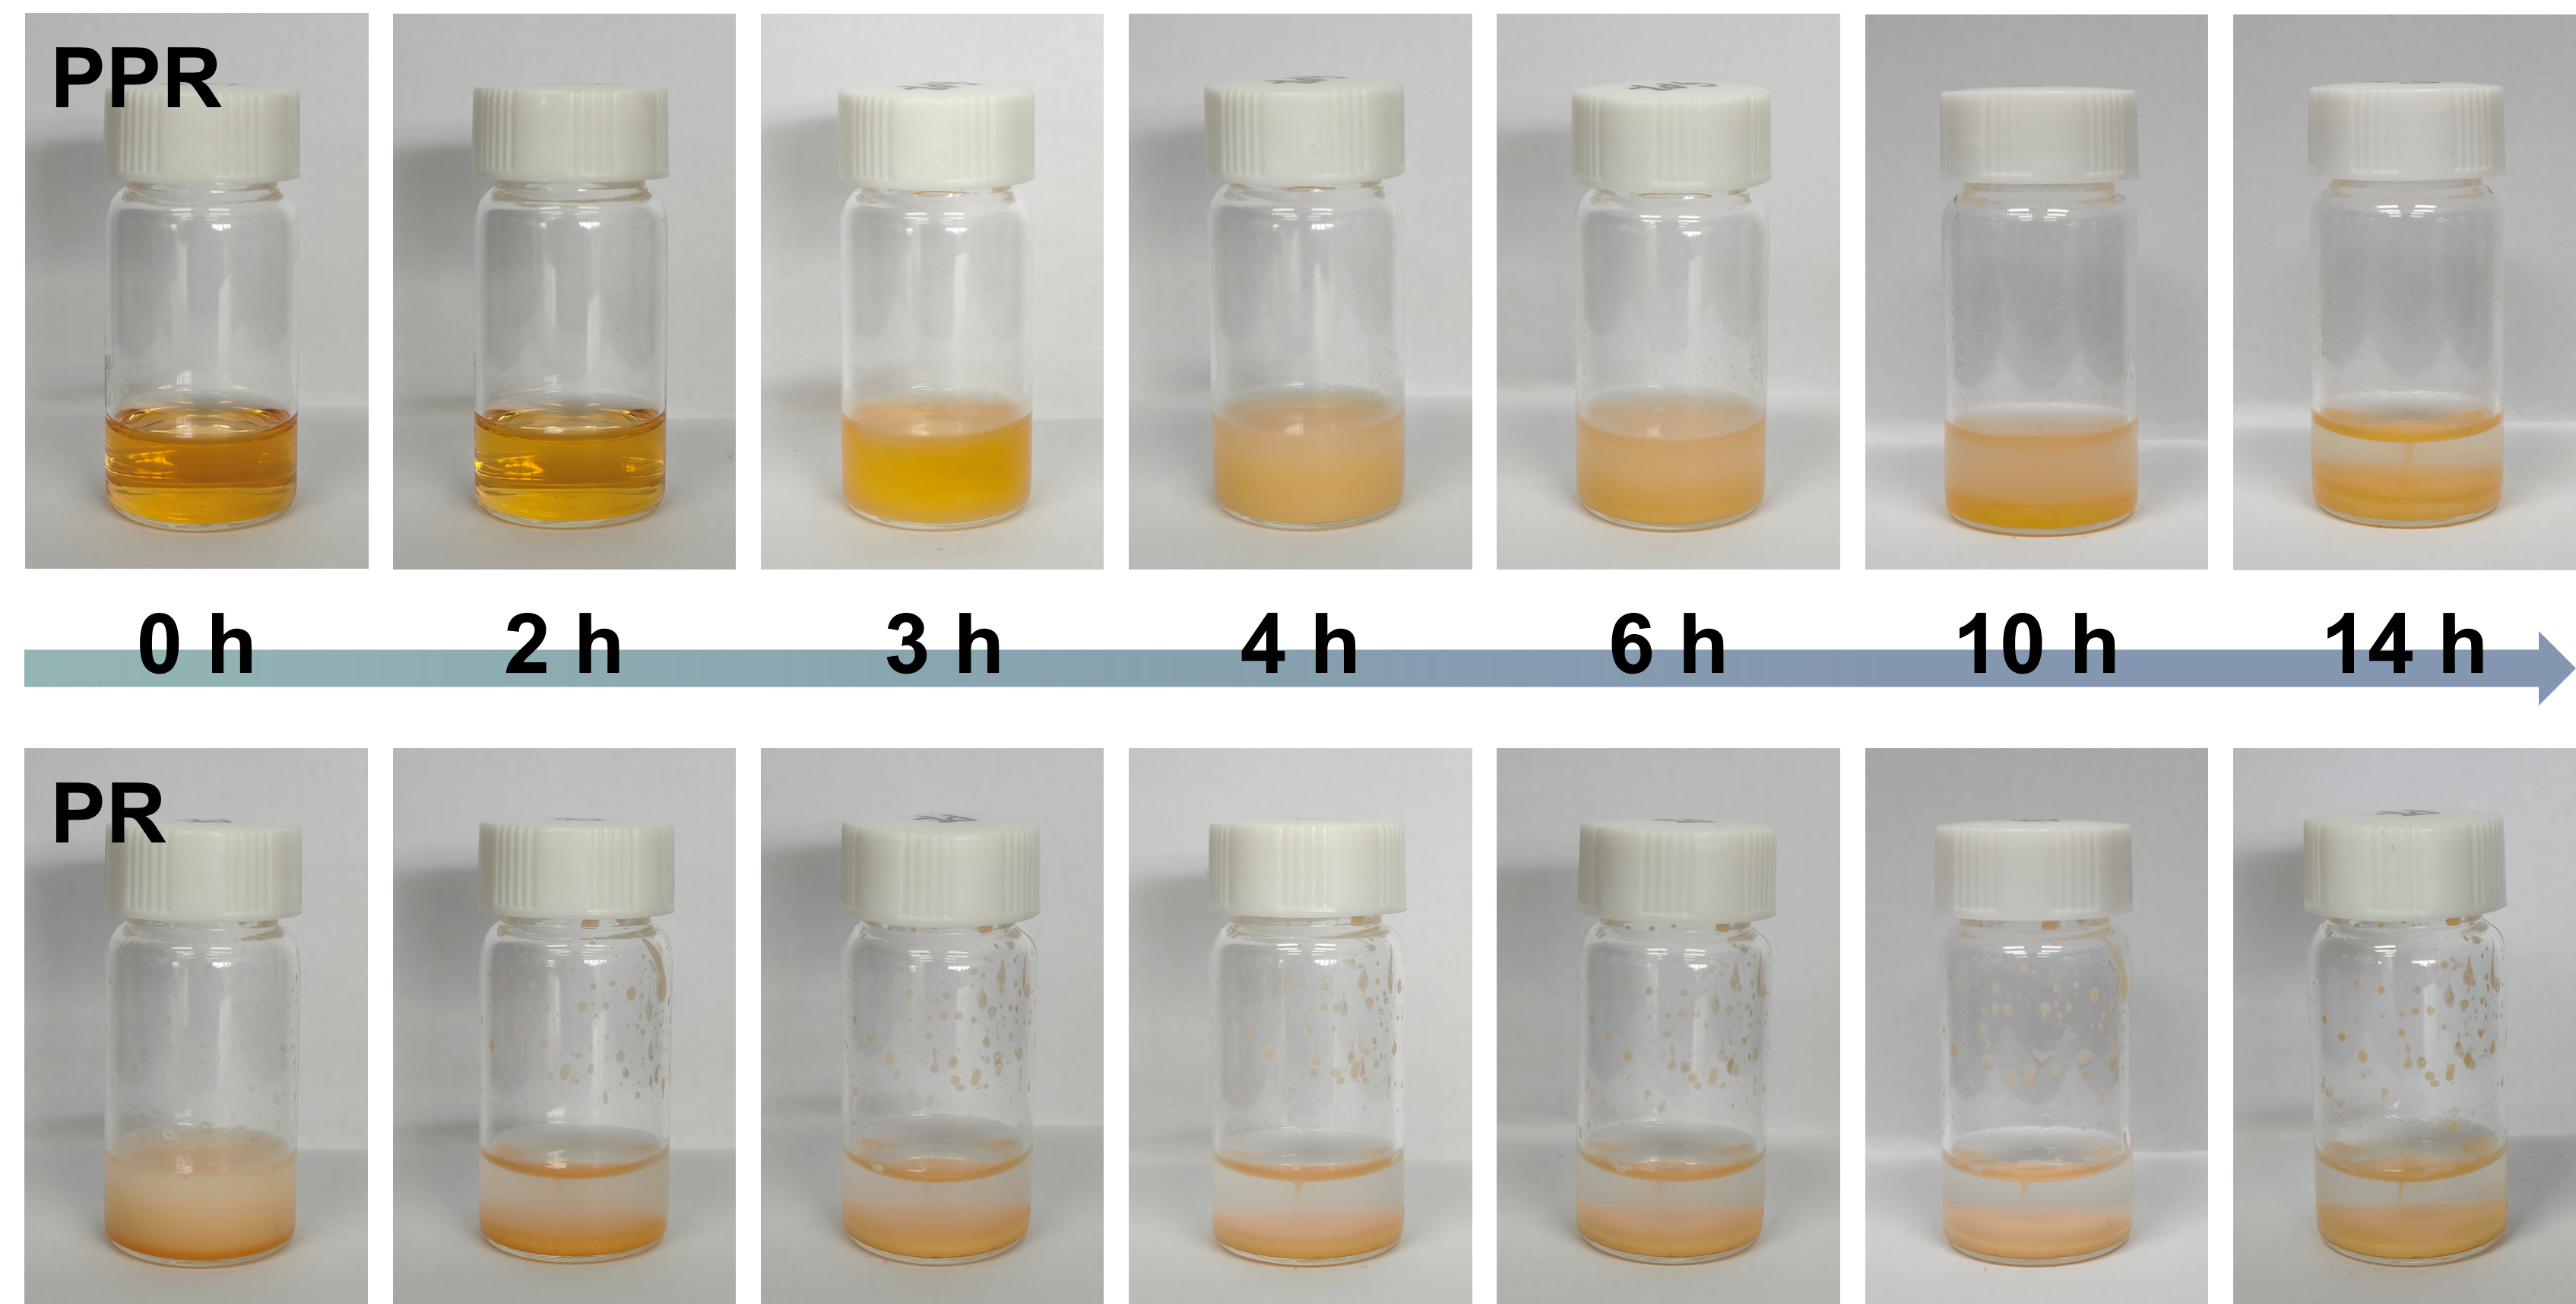


**Supplementary Fig. 2** The digital photographs of synthesis process of PPR and PR aggregates with different reaction time.


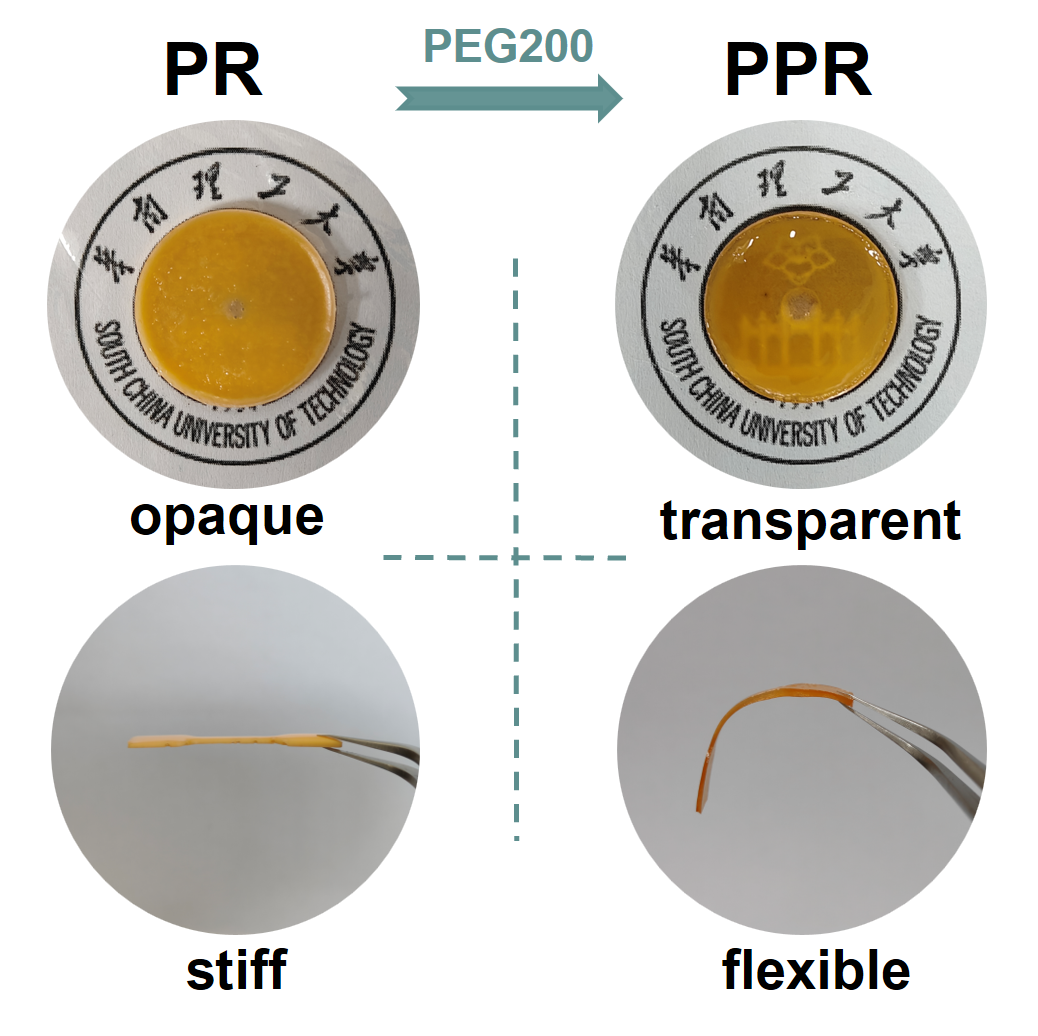


**Supplementary Fig. 3** The photographs of the transparency and flexibility of PPR and PR aggregates.


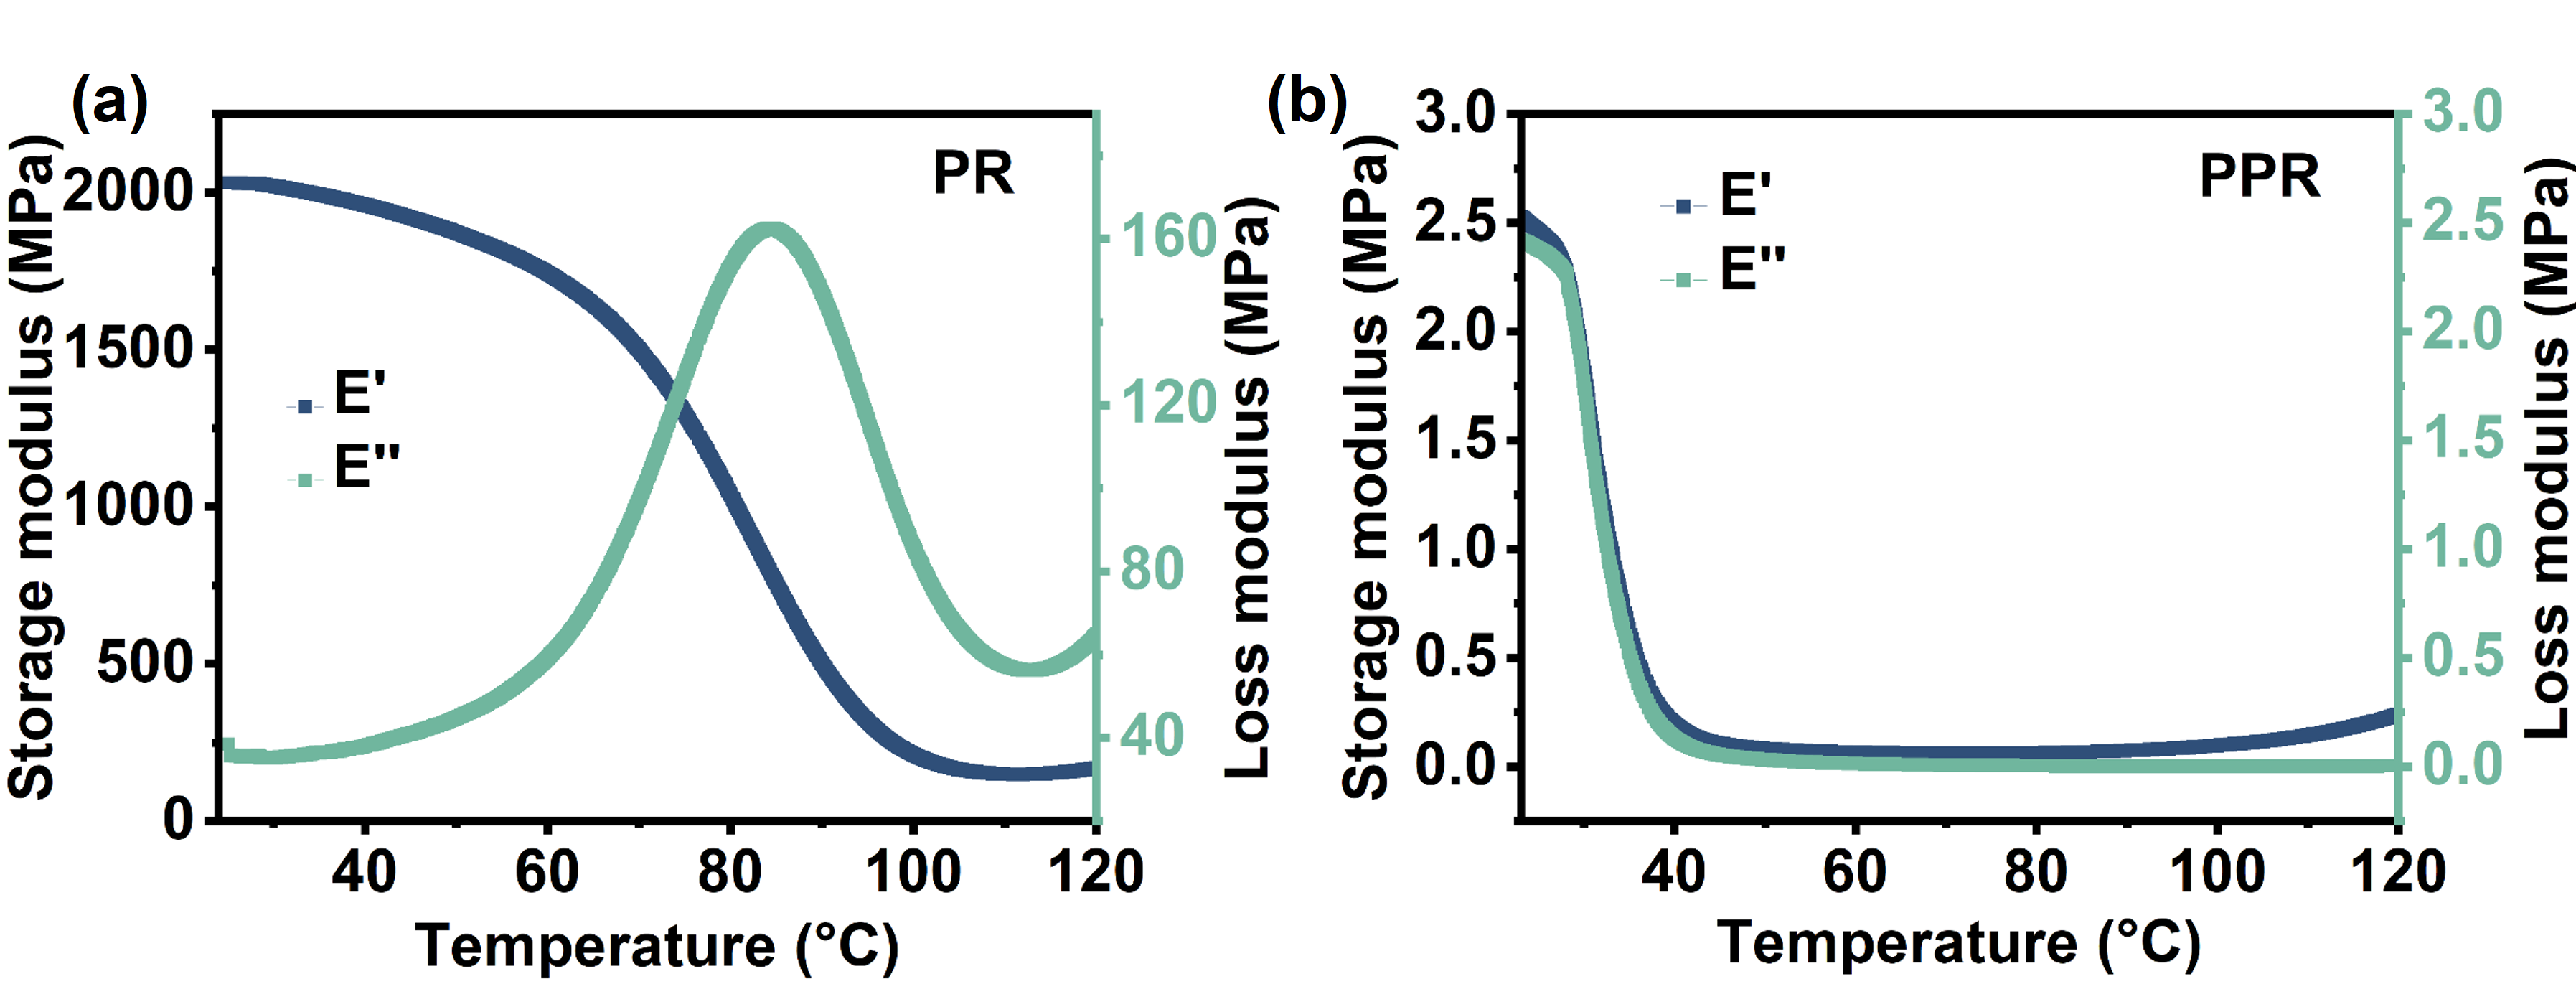


**Supplementary Fig. 4** The storage modulus (E’), loss modulus (E”) for PR and PPR aggregates at 25~120 °C by DMA in compression mode (frequency:1 Hz).


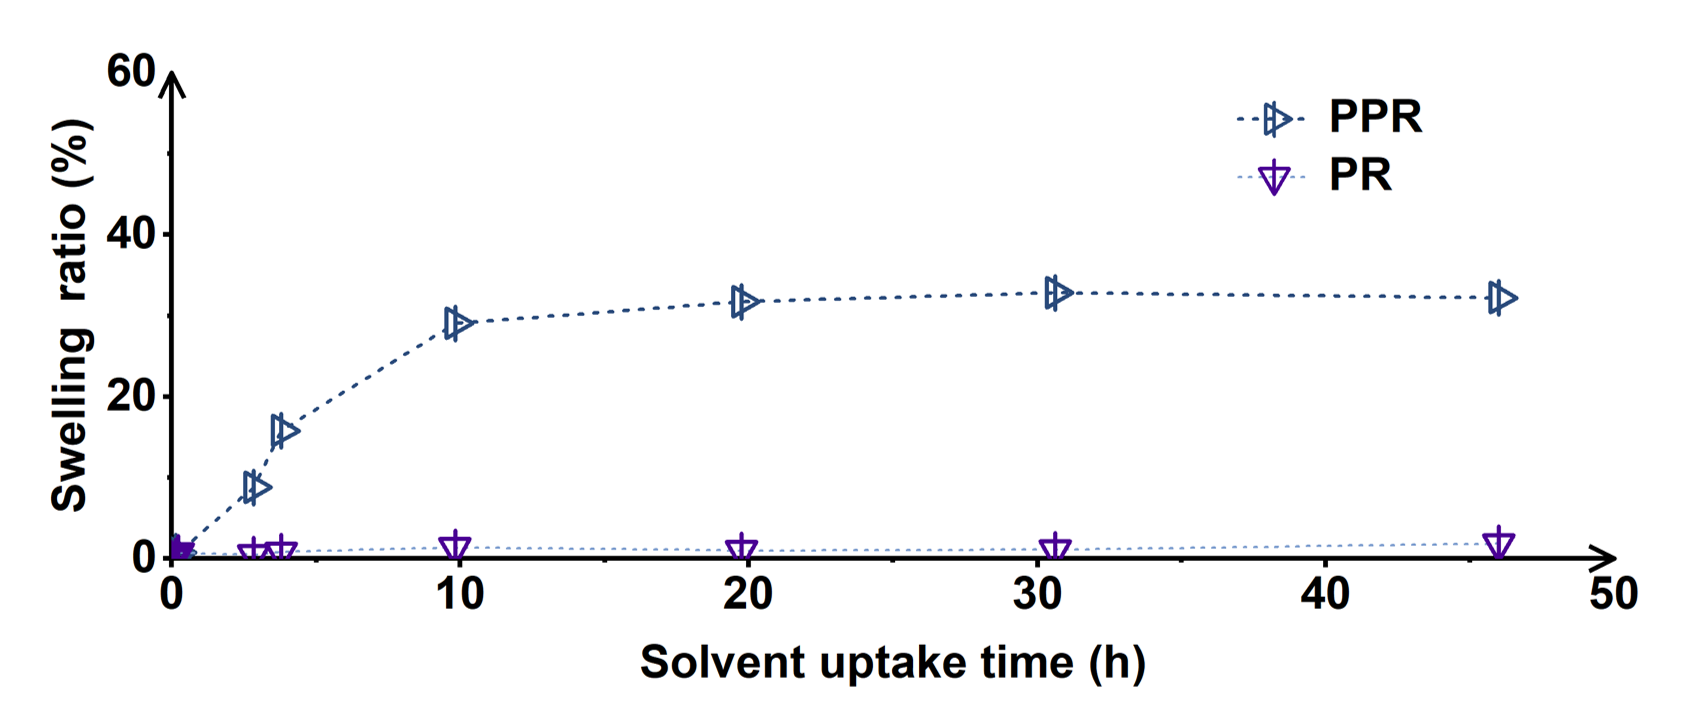


**Supplementary Fig. 5** Swelling ratio of PPR and PR aggregates in ethanol solvent.


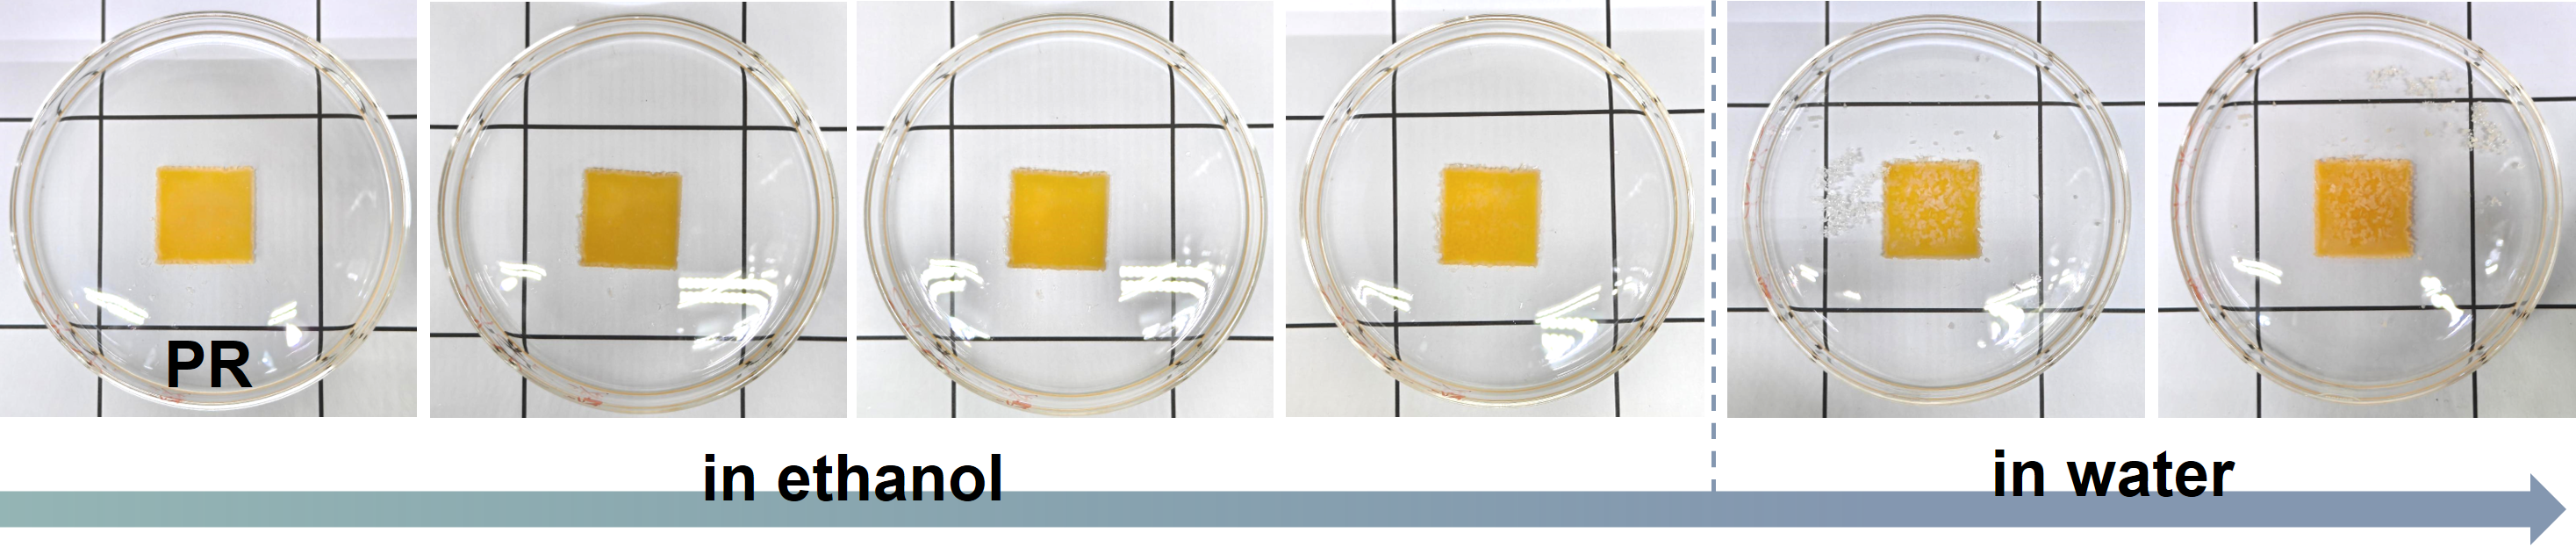


**Supplementary Fig. 6** Photos of the immersion process of PR aggregates in ethanol and water solvents.


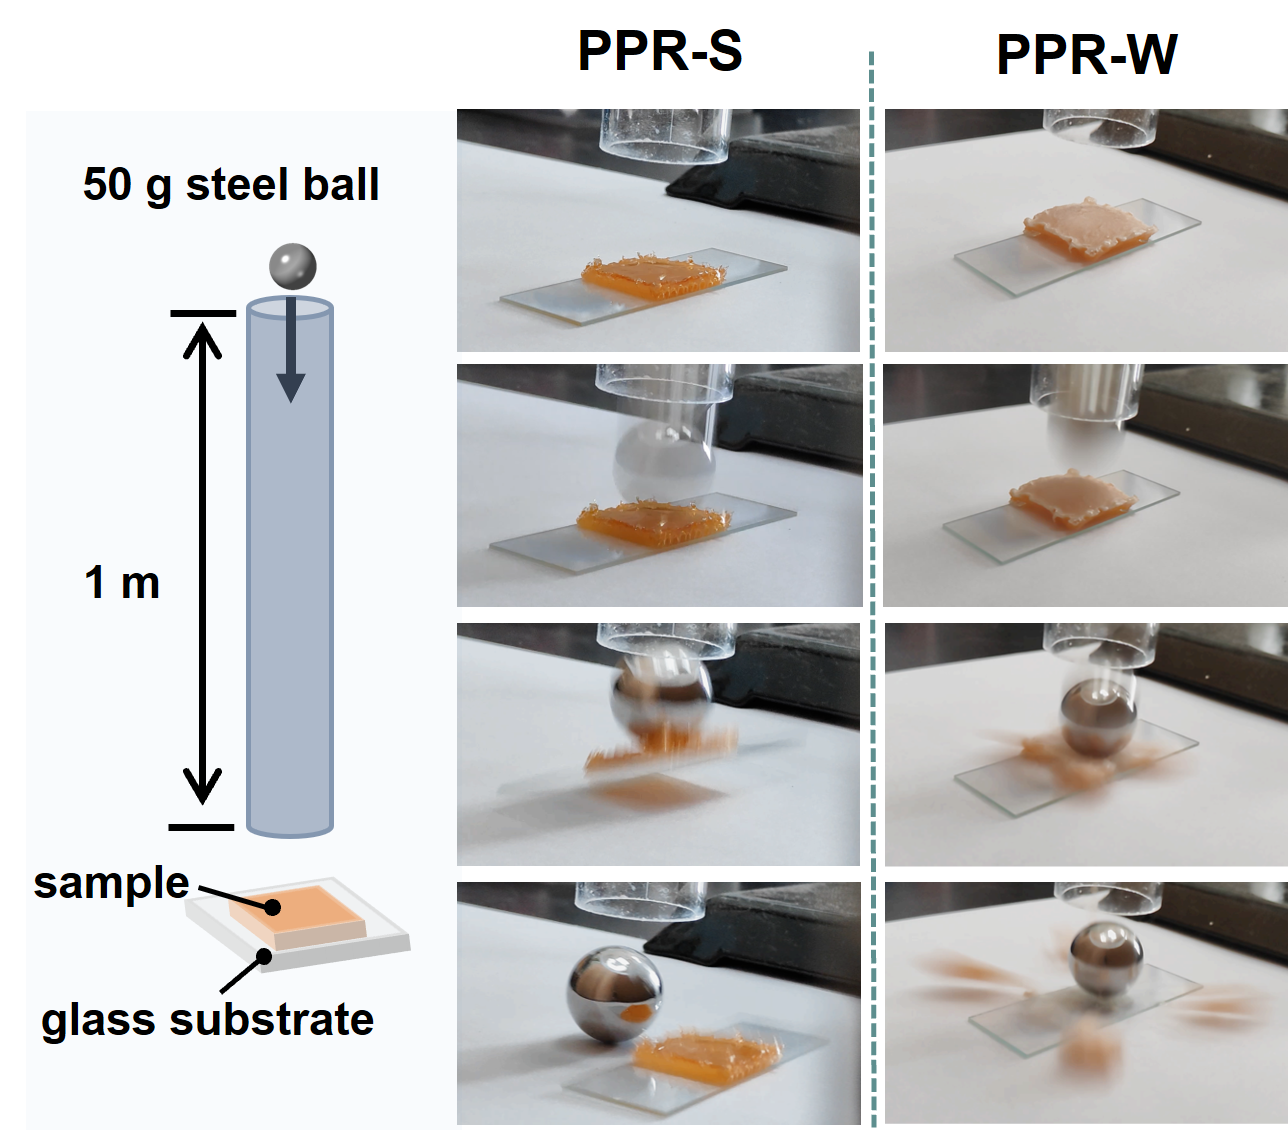


**Supplementary Fig. 7** Photographs of the PPR and PPR-A aggregates during falling-ball test.


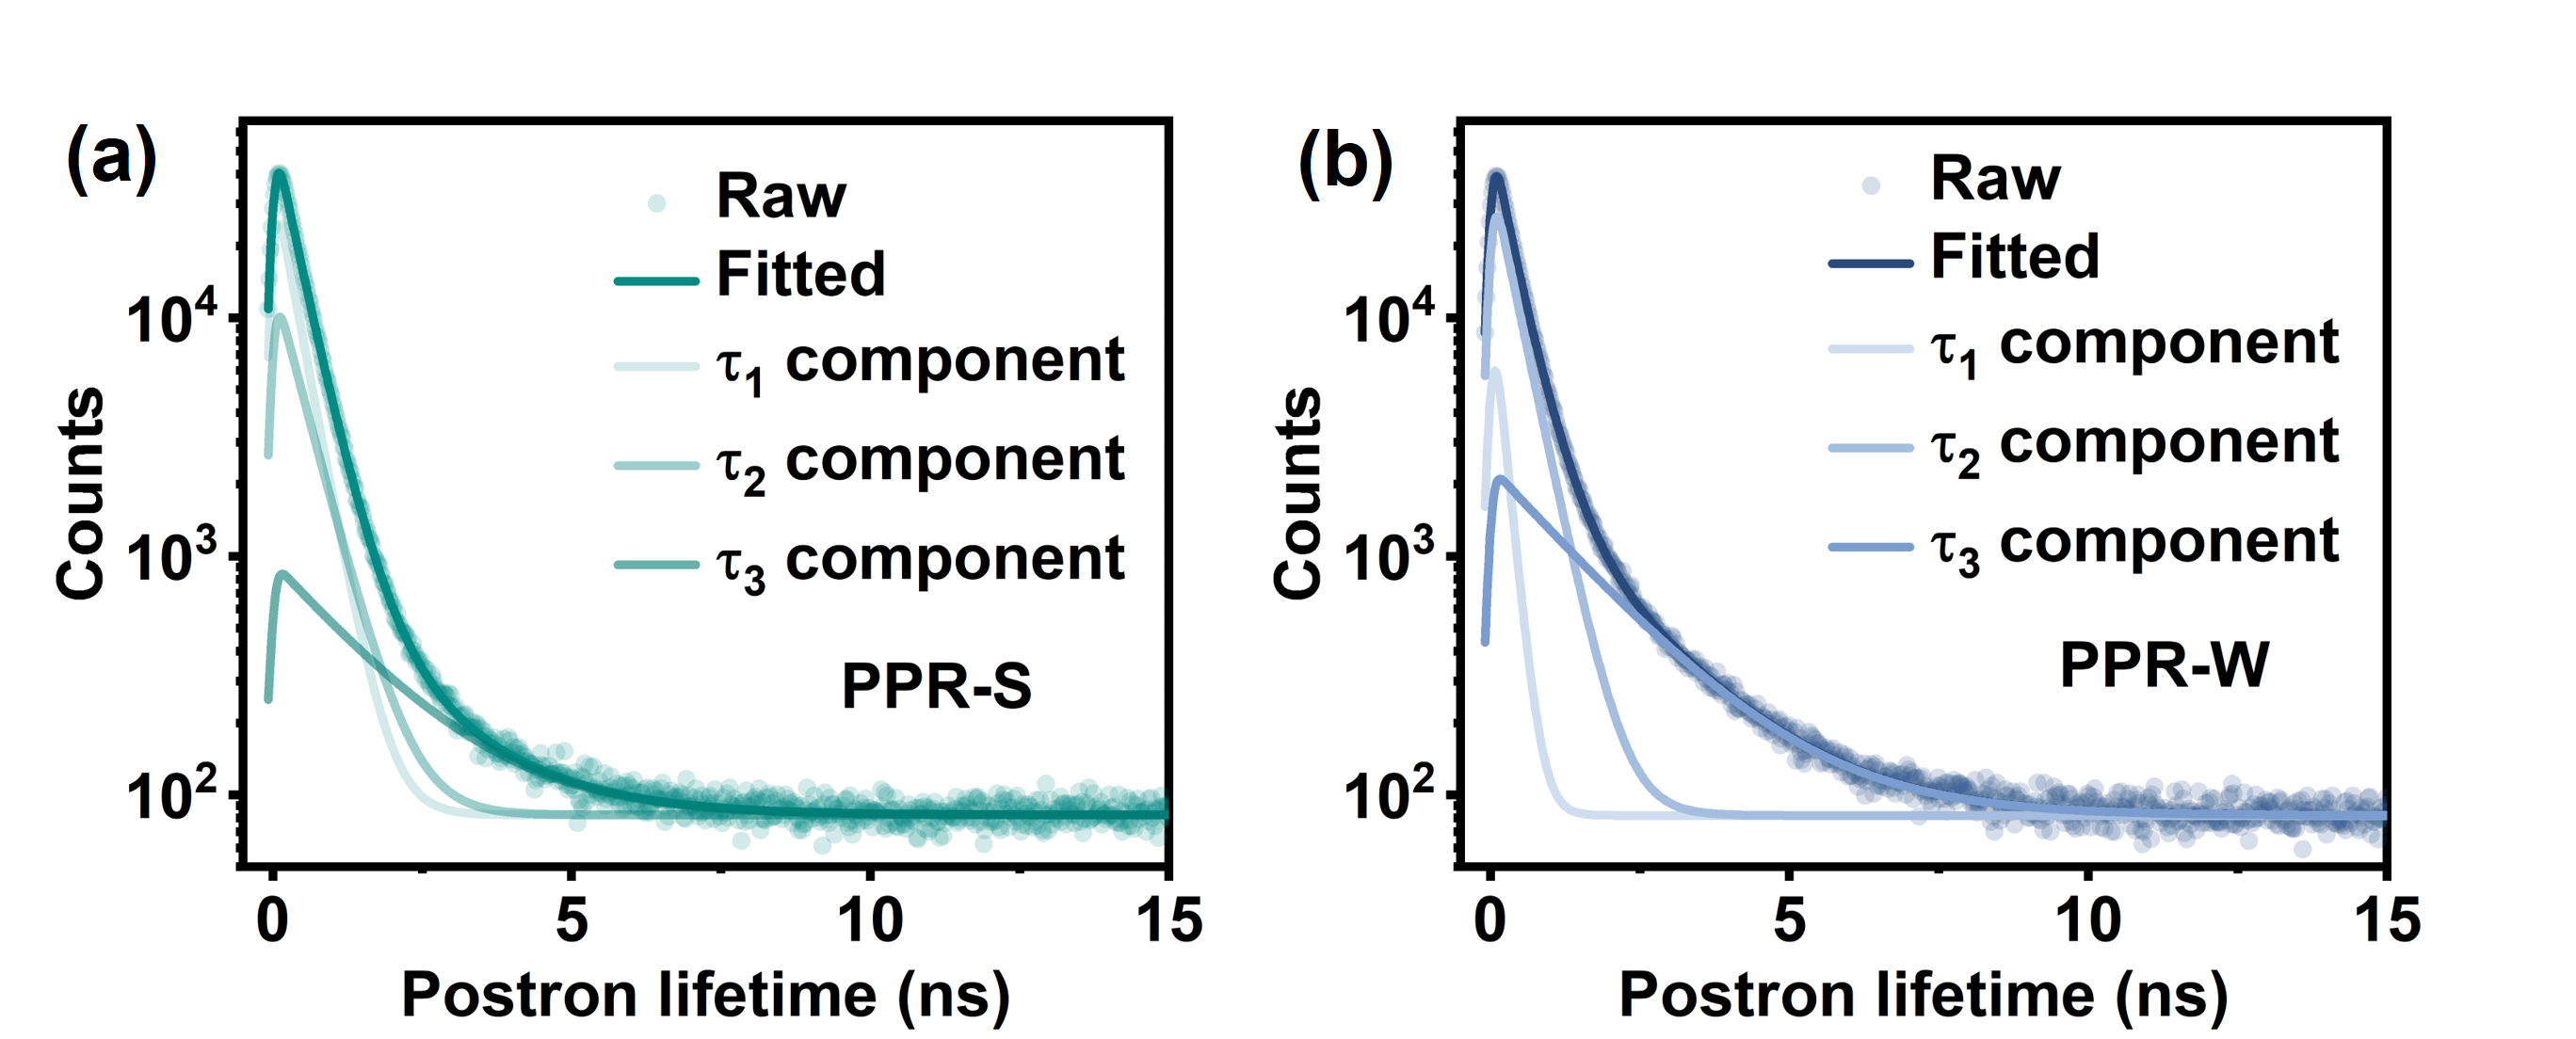


**Supplementary Fig. 8** Fitted PALS spectra of (a) PPR-S and (b) PPR-W aggregates.


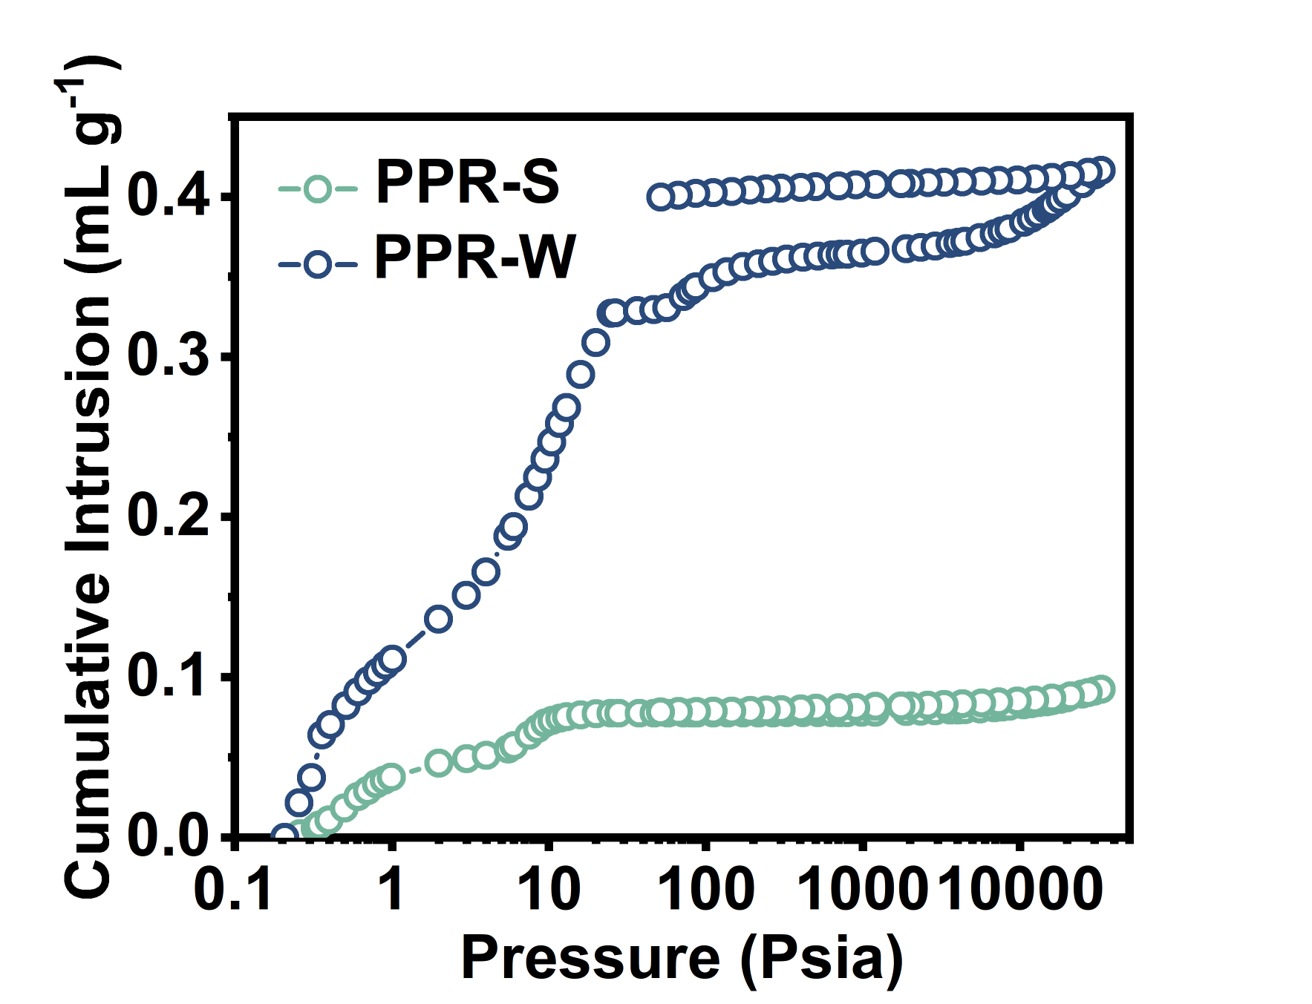


**Supplementary Fig. 9** The mercury porosimetry intrusion and retraction curves of PPR-S and PPR-W aggregates.


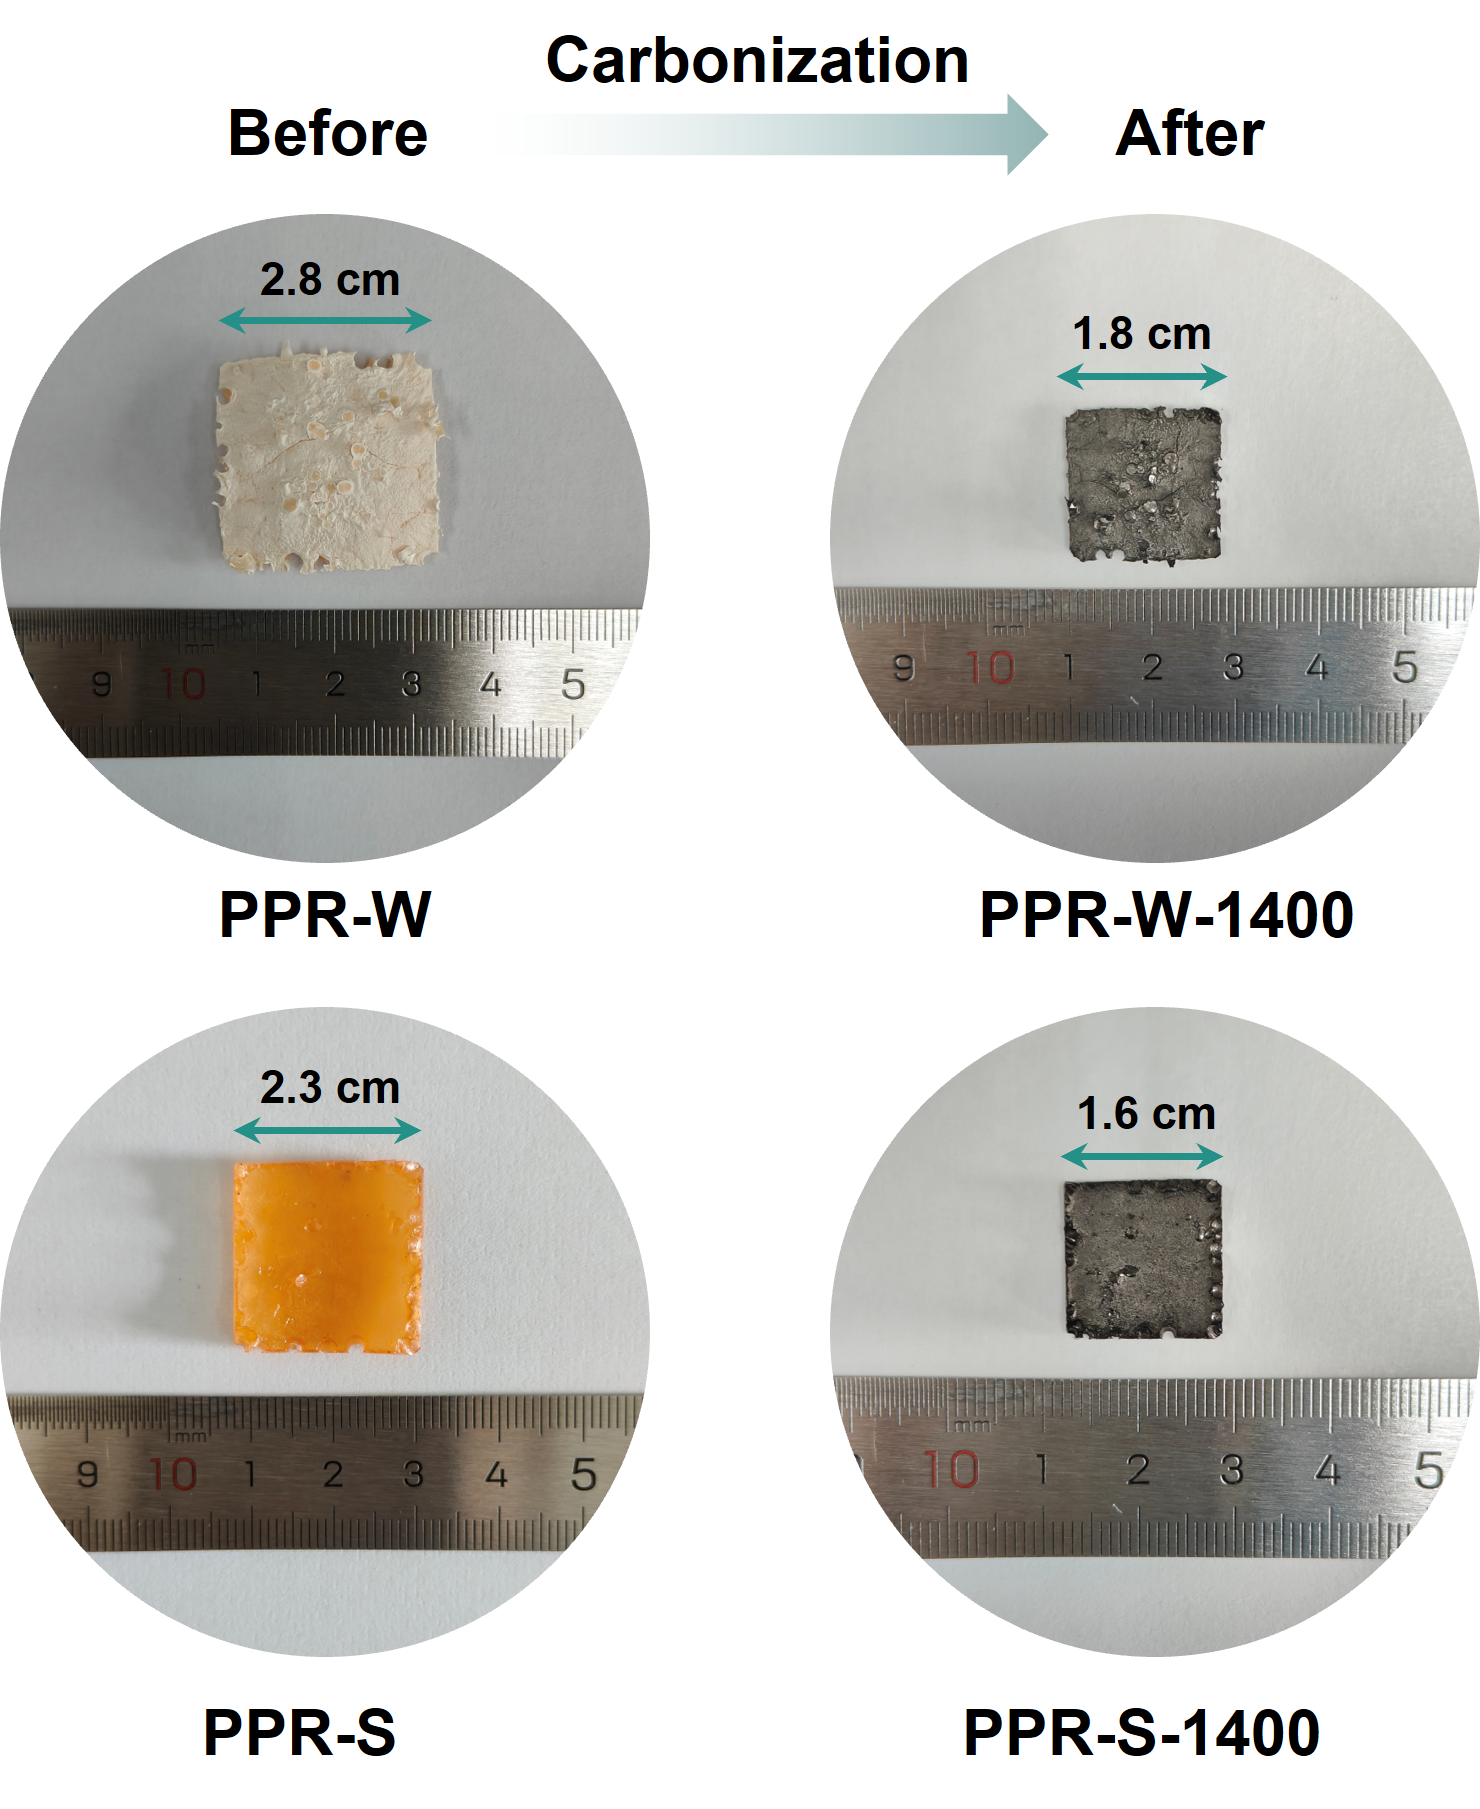


**Supplementary Fig. 10** Photographs of the PPR-S and PPR-W aggregates before and after carbonization process.


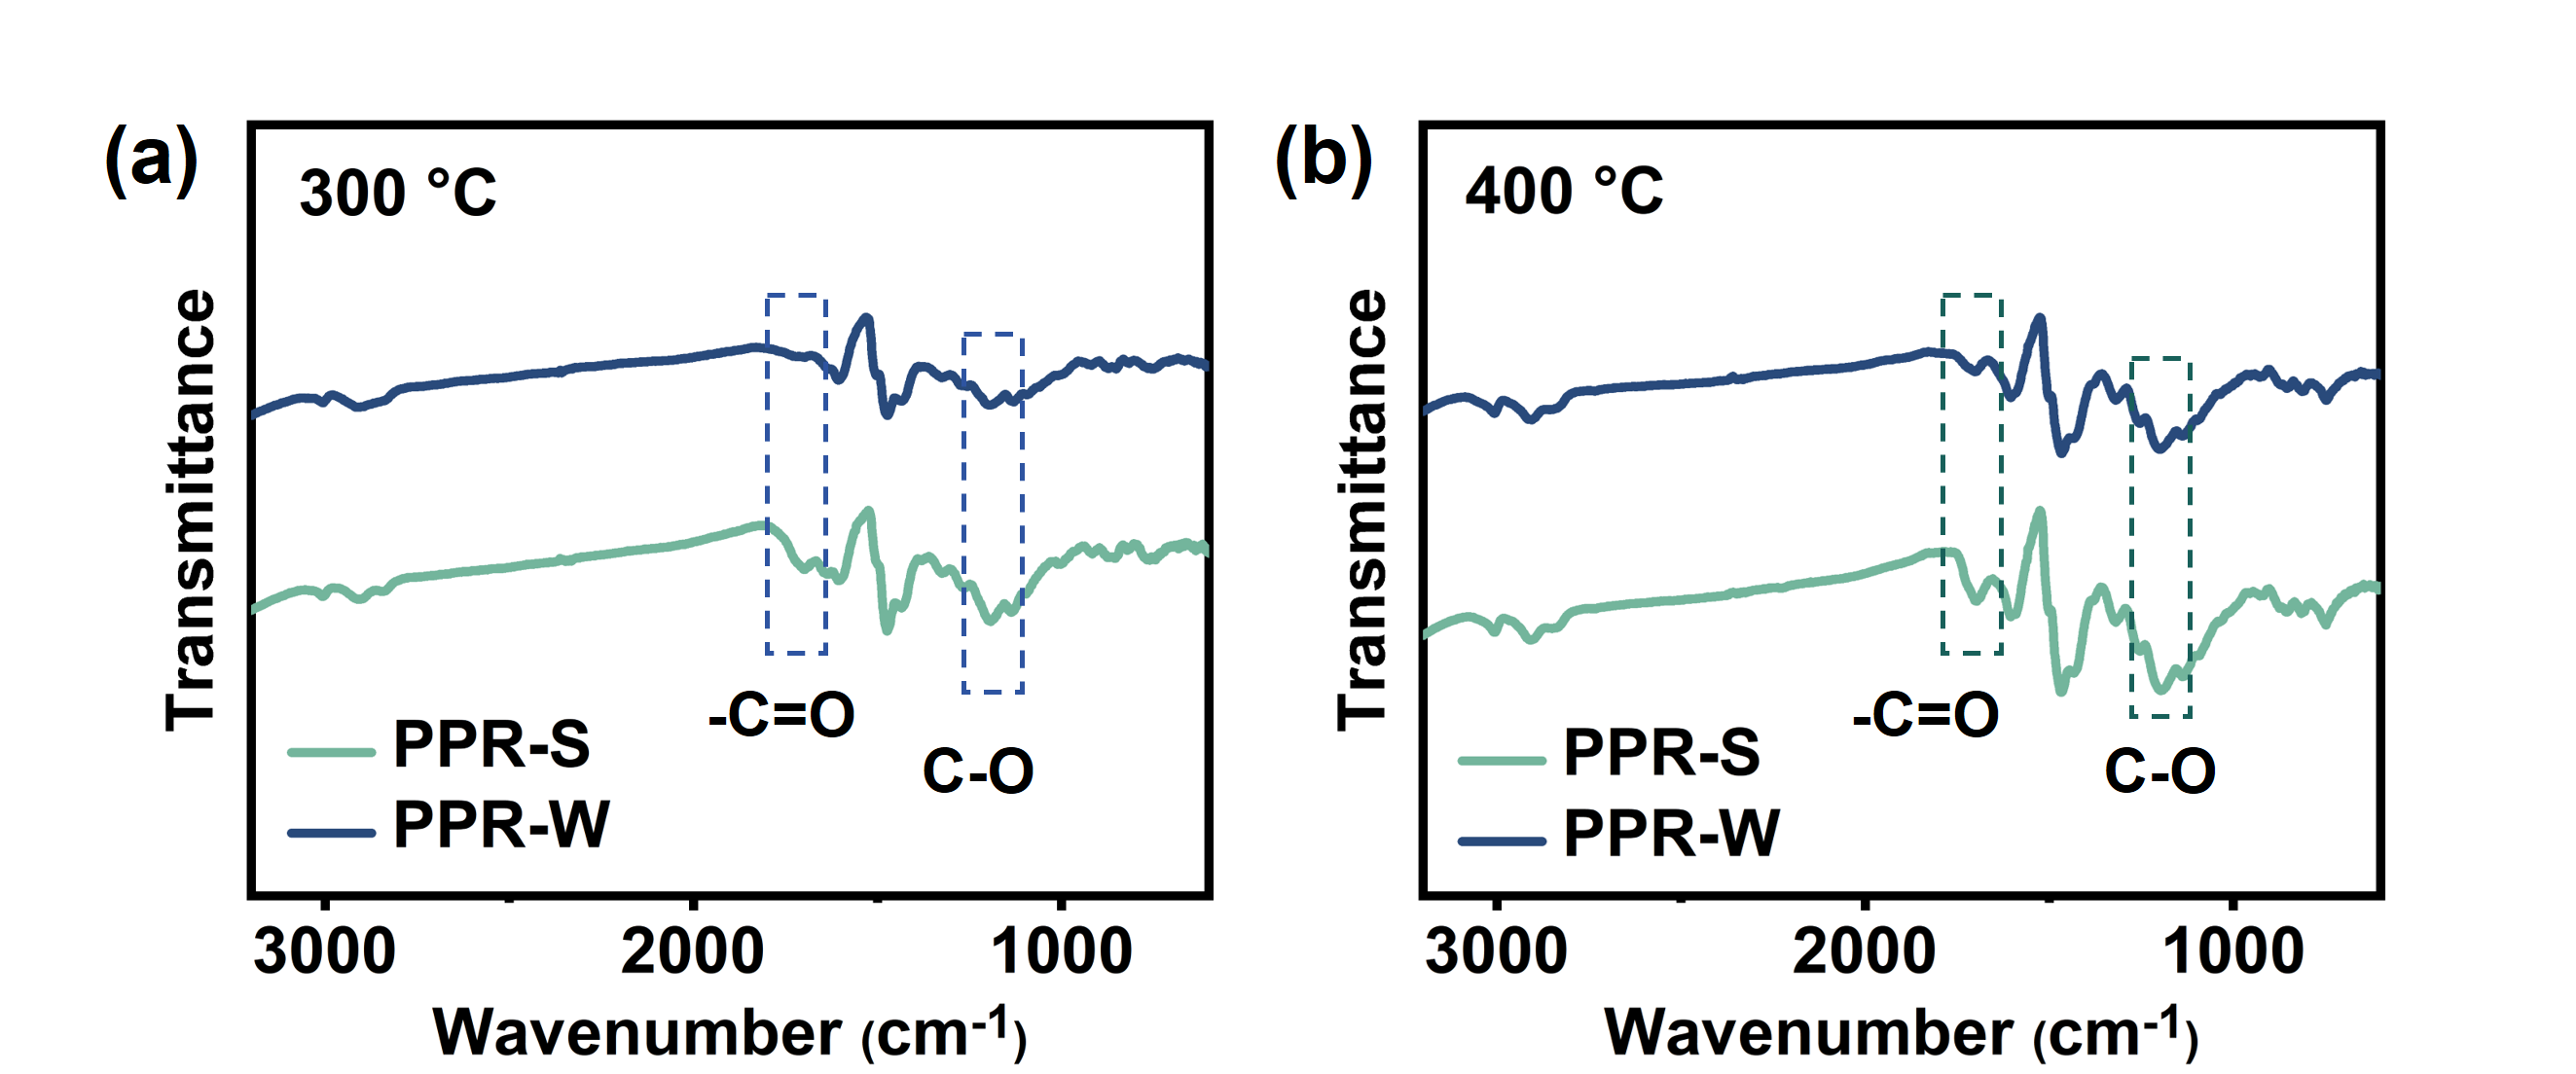


**Supplementary Fig. 11** FTIR spectrums of PPR-S and PPR-W aggregates at (a) 300 °C and (b) 400 °C.


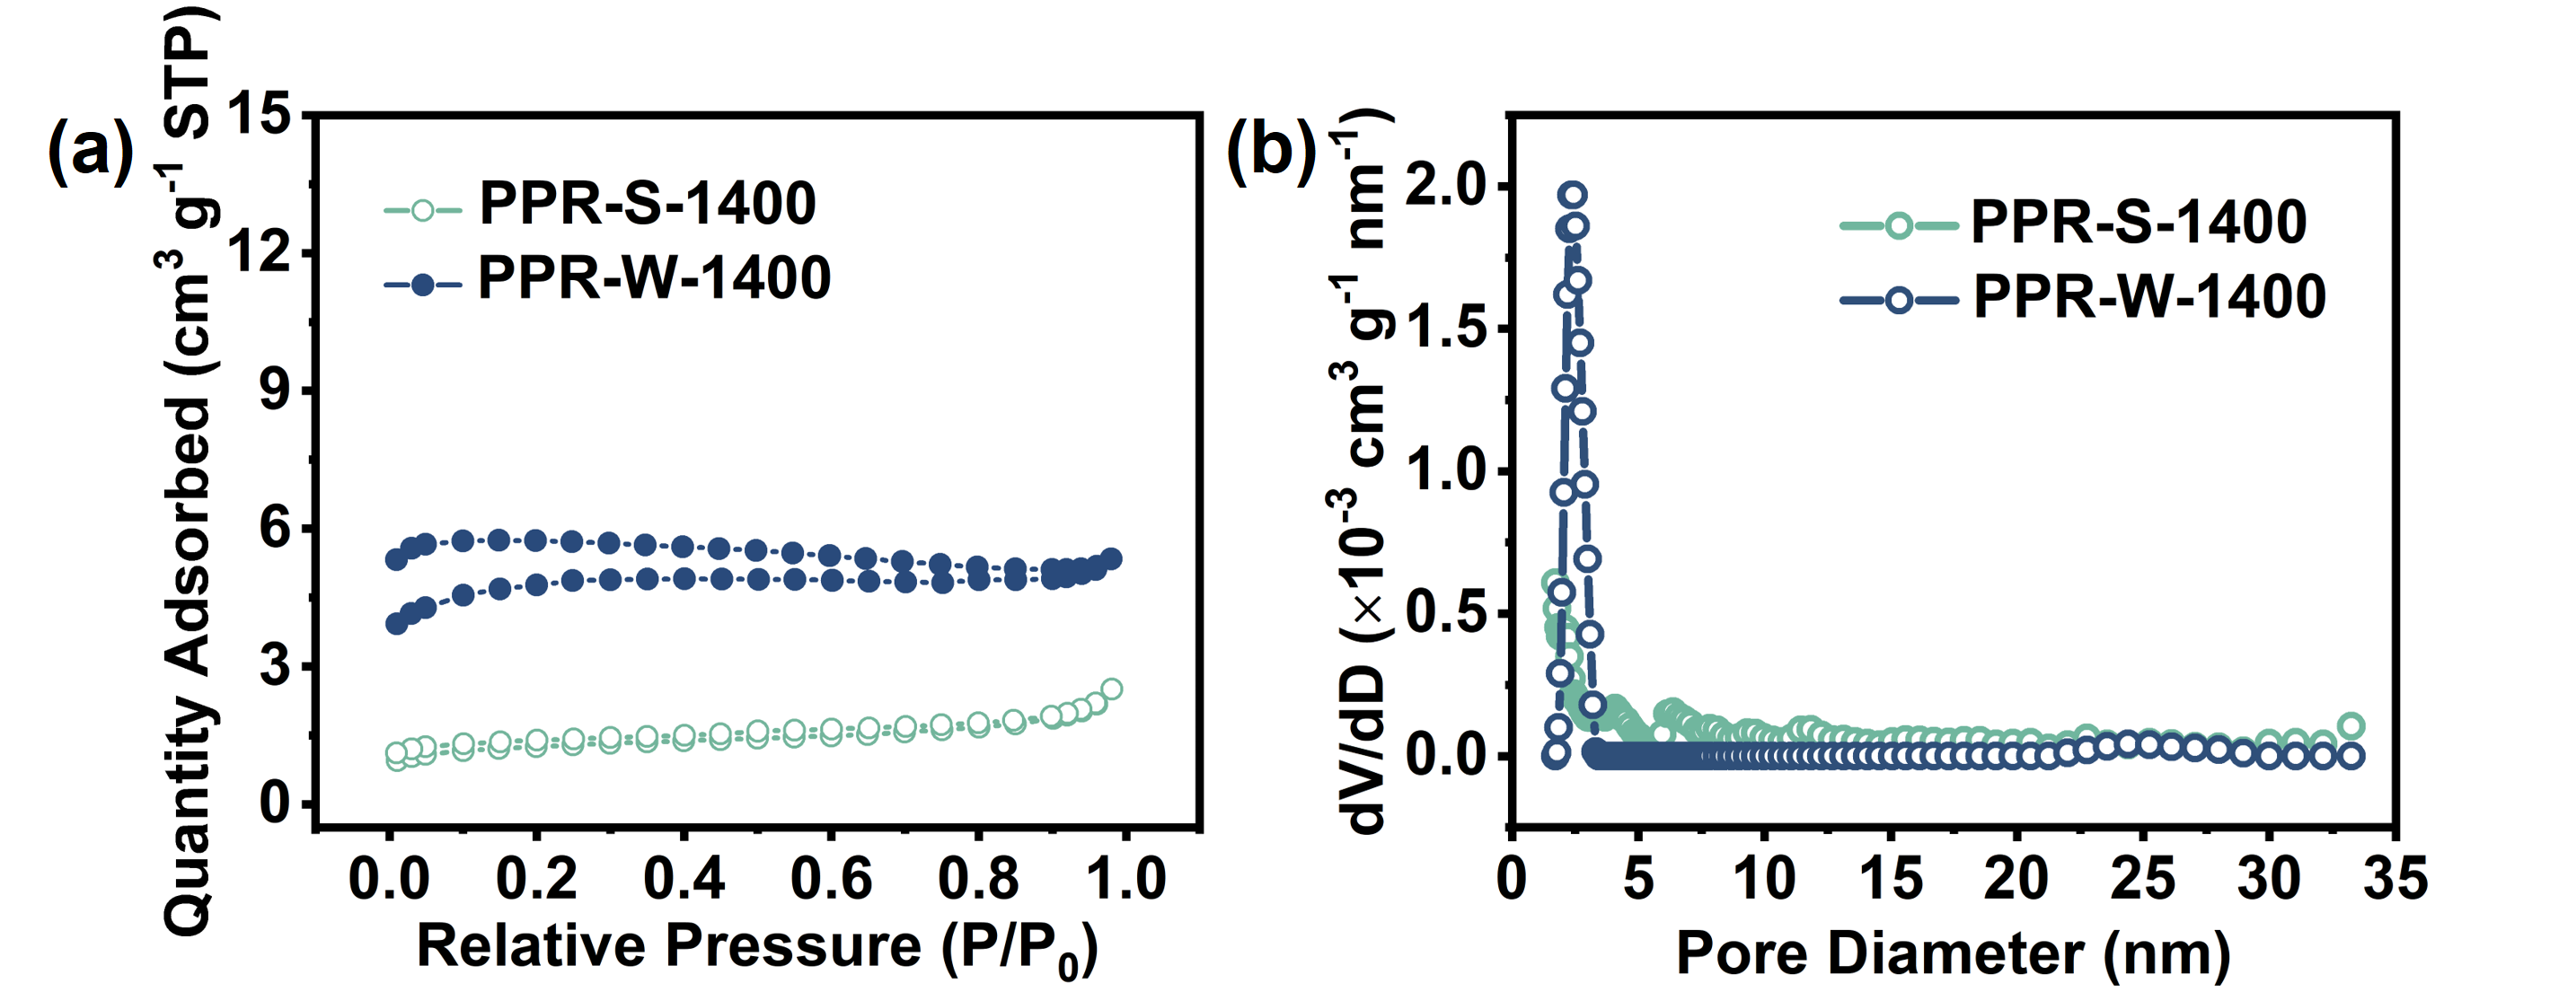


**Supplementary Fig. 12** (a) N2 adsorption/desorption isotherms and (b) pore size distribution of PPR-S-1400 and PPR-W-1400 anodes.


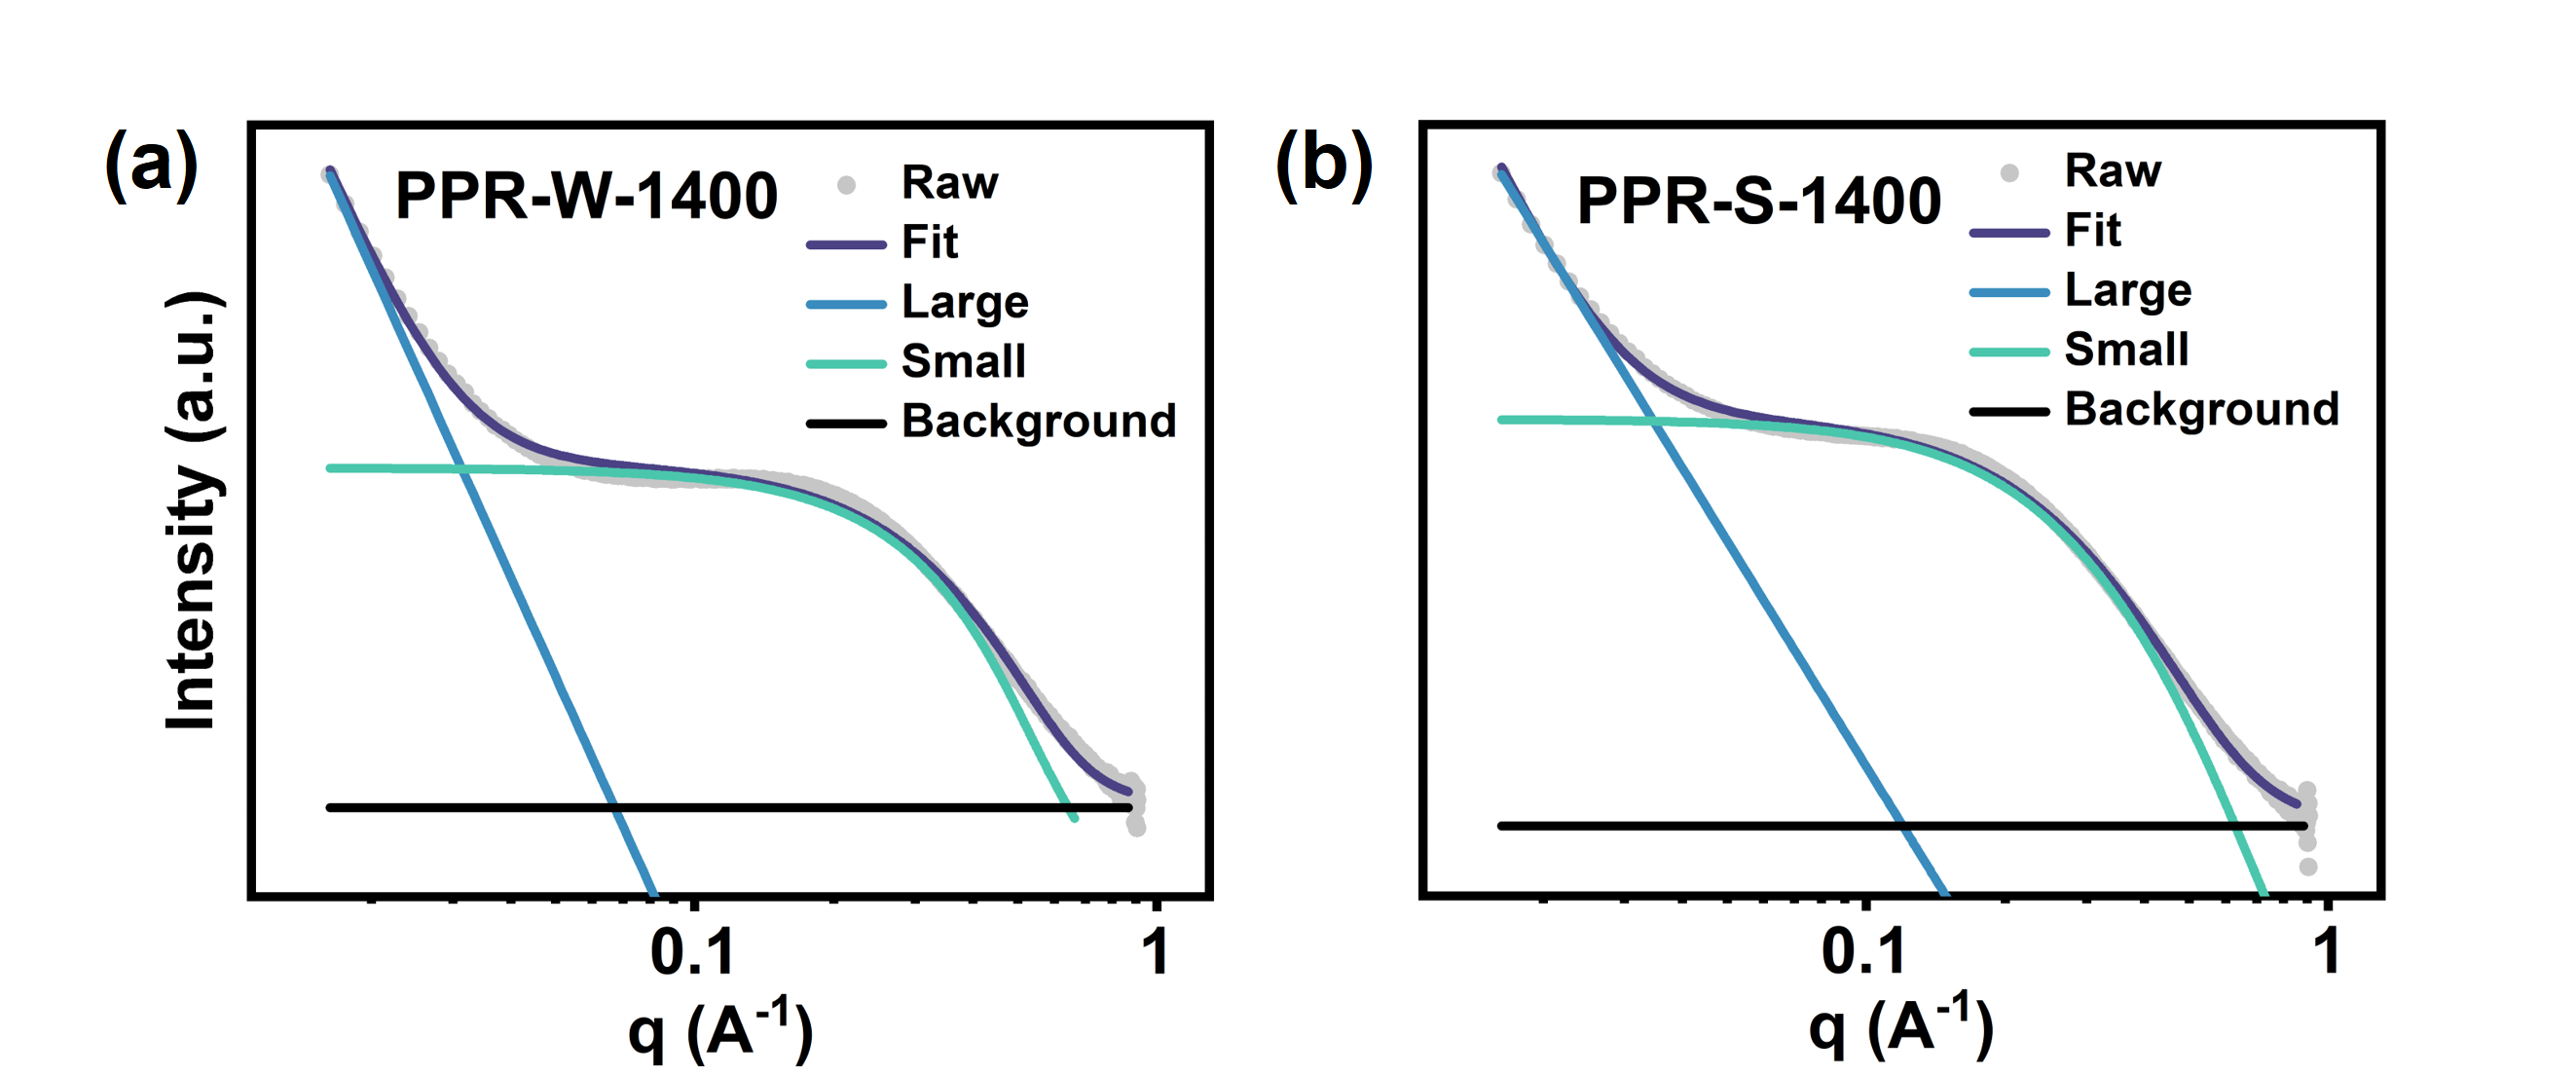


**Supplementary Fig. 13** Fitted SAXS curves of (a) PPR-W-1400 and (b) PPR-S-1400 anodes.


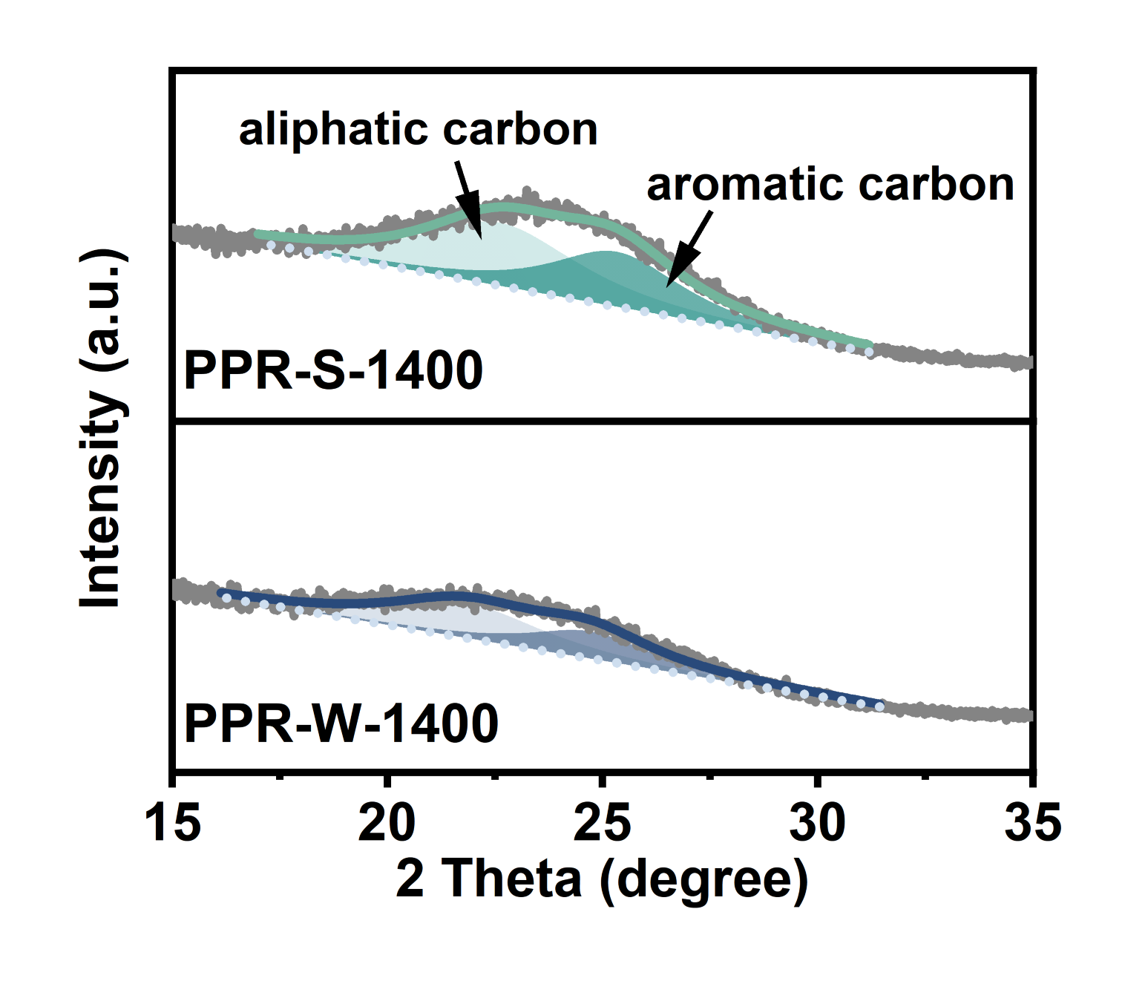


**Supplementary Fig. 14** Fitted XRD curves of PPR-W-1400 and PPR-S-1400 anodes.


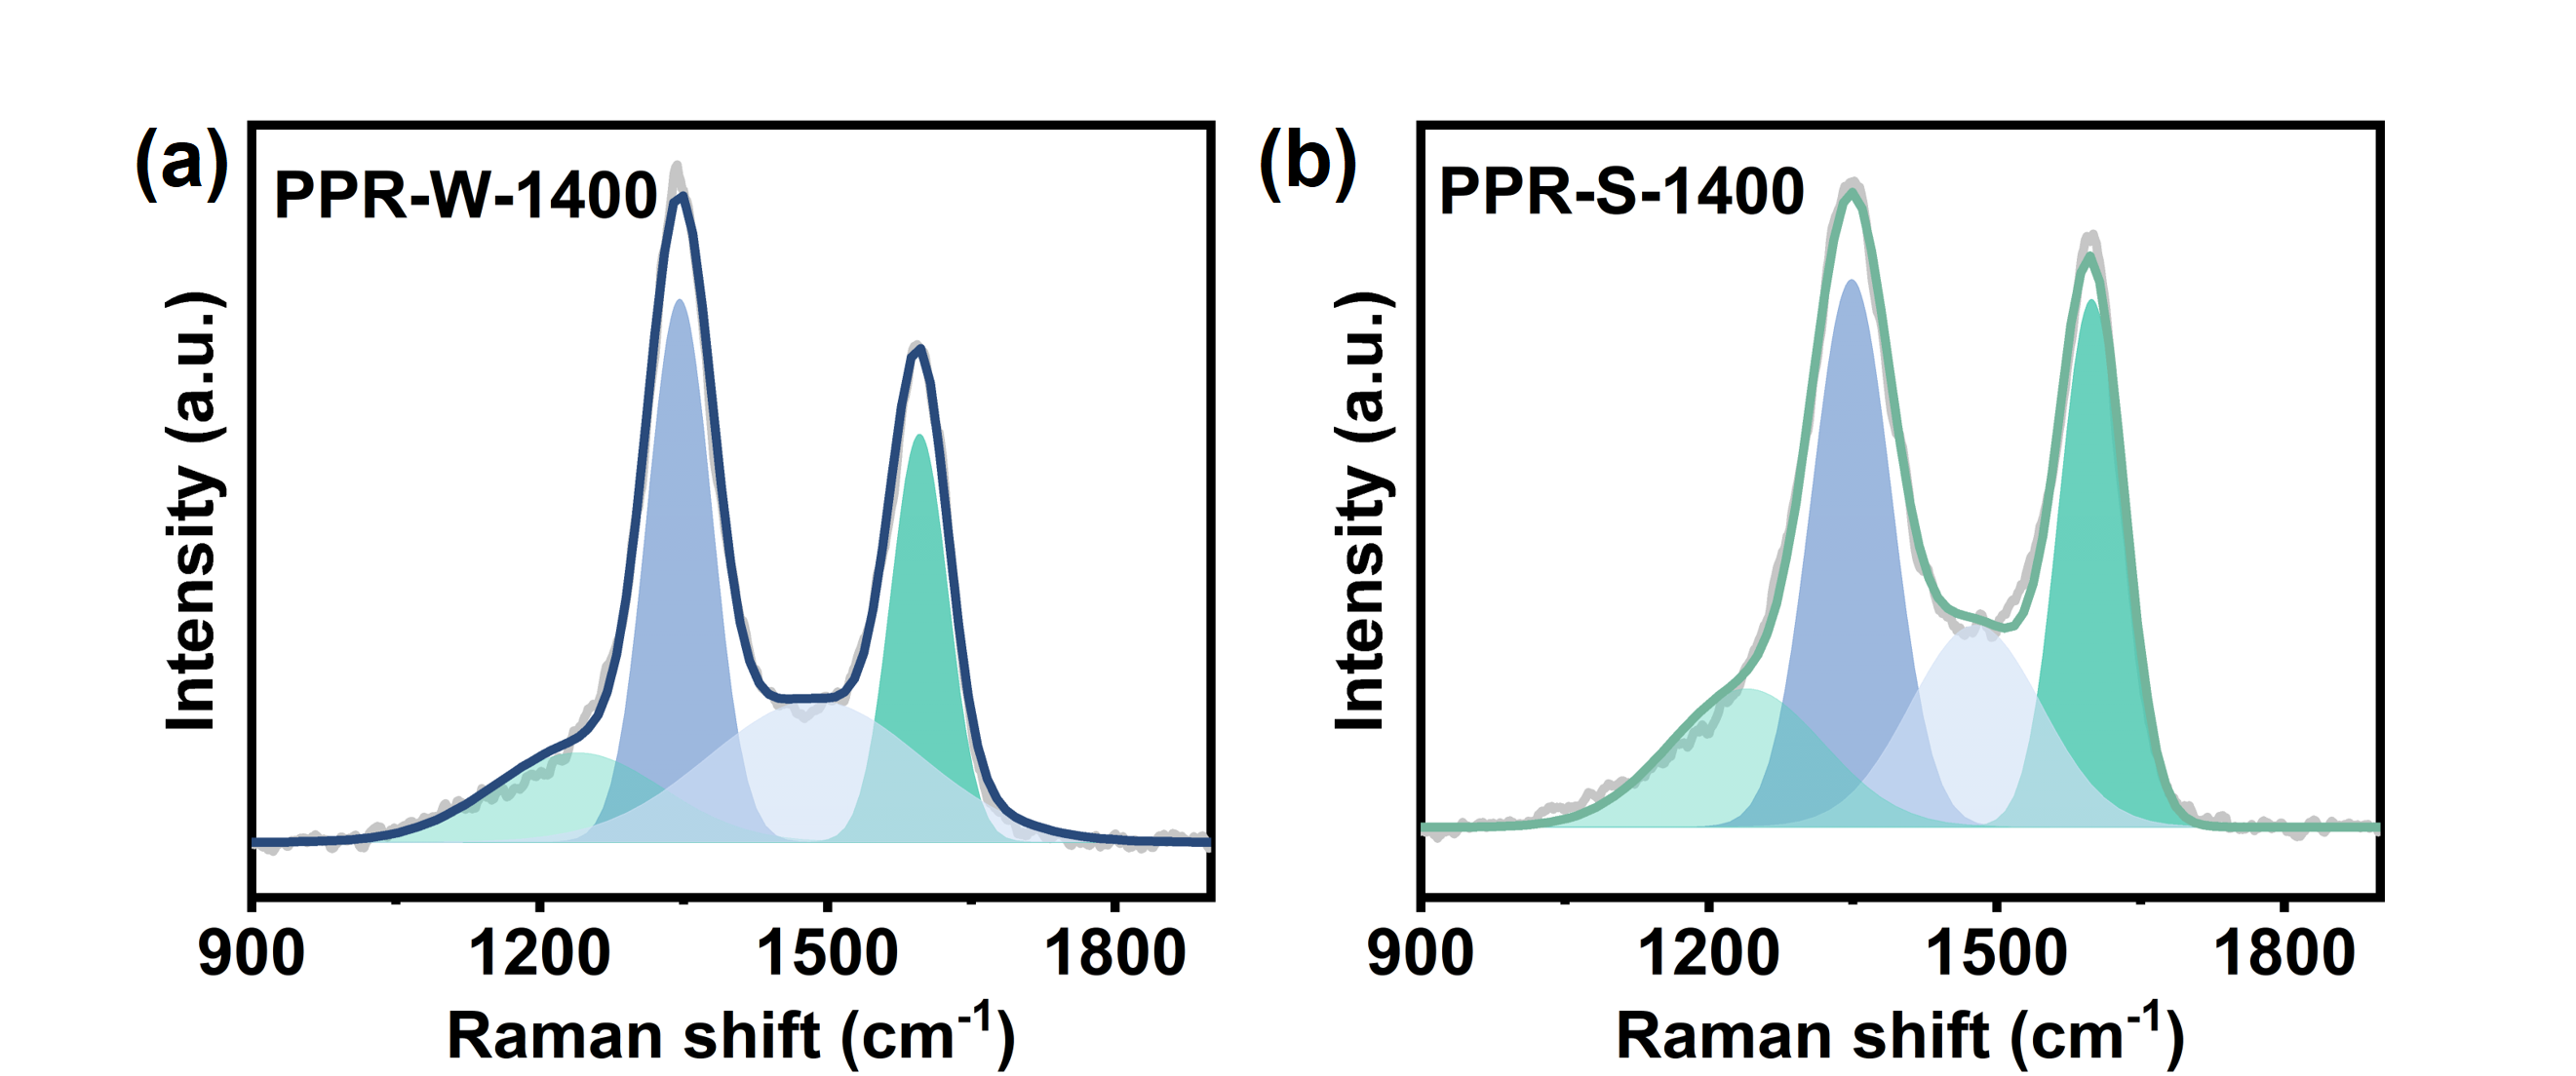


**Supplementary Fig. 15** Fitted Raman curves of (a) PPR-W-1400 and (b) PPR-S-1400 anodes.


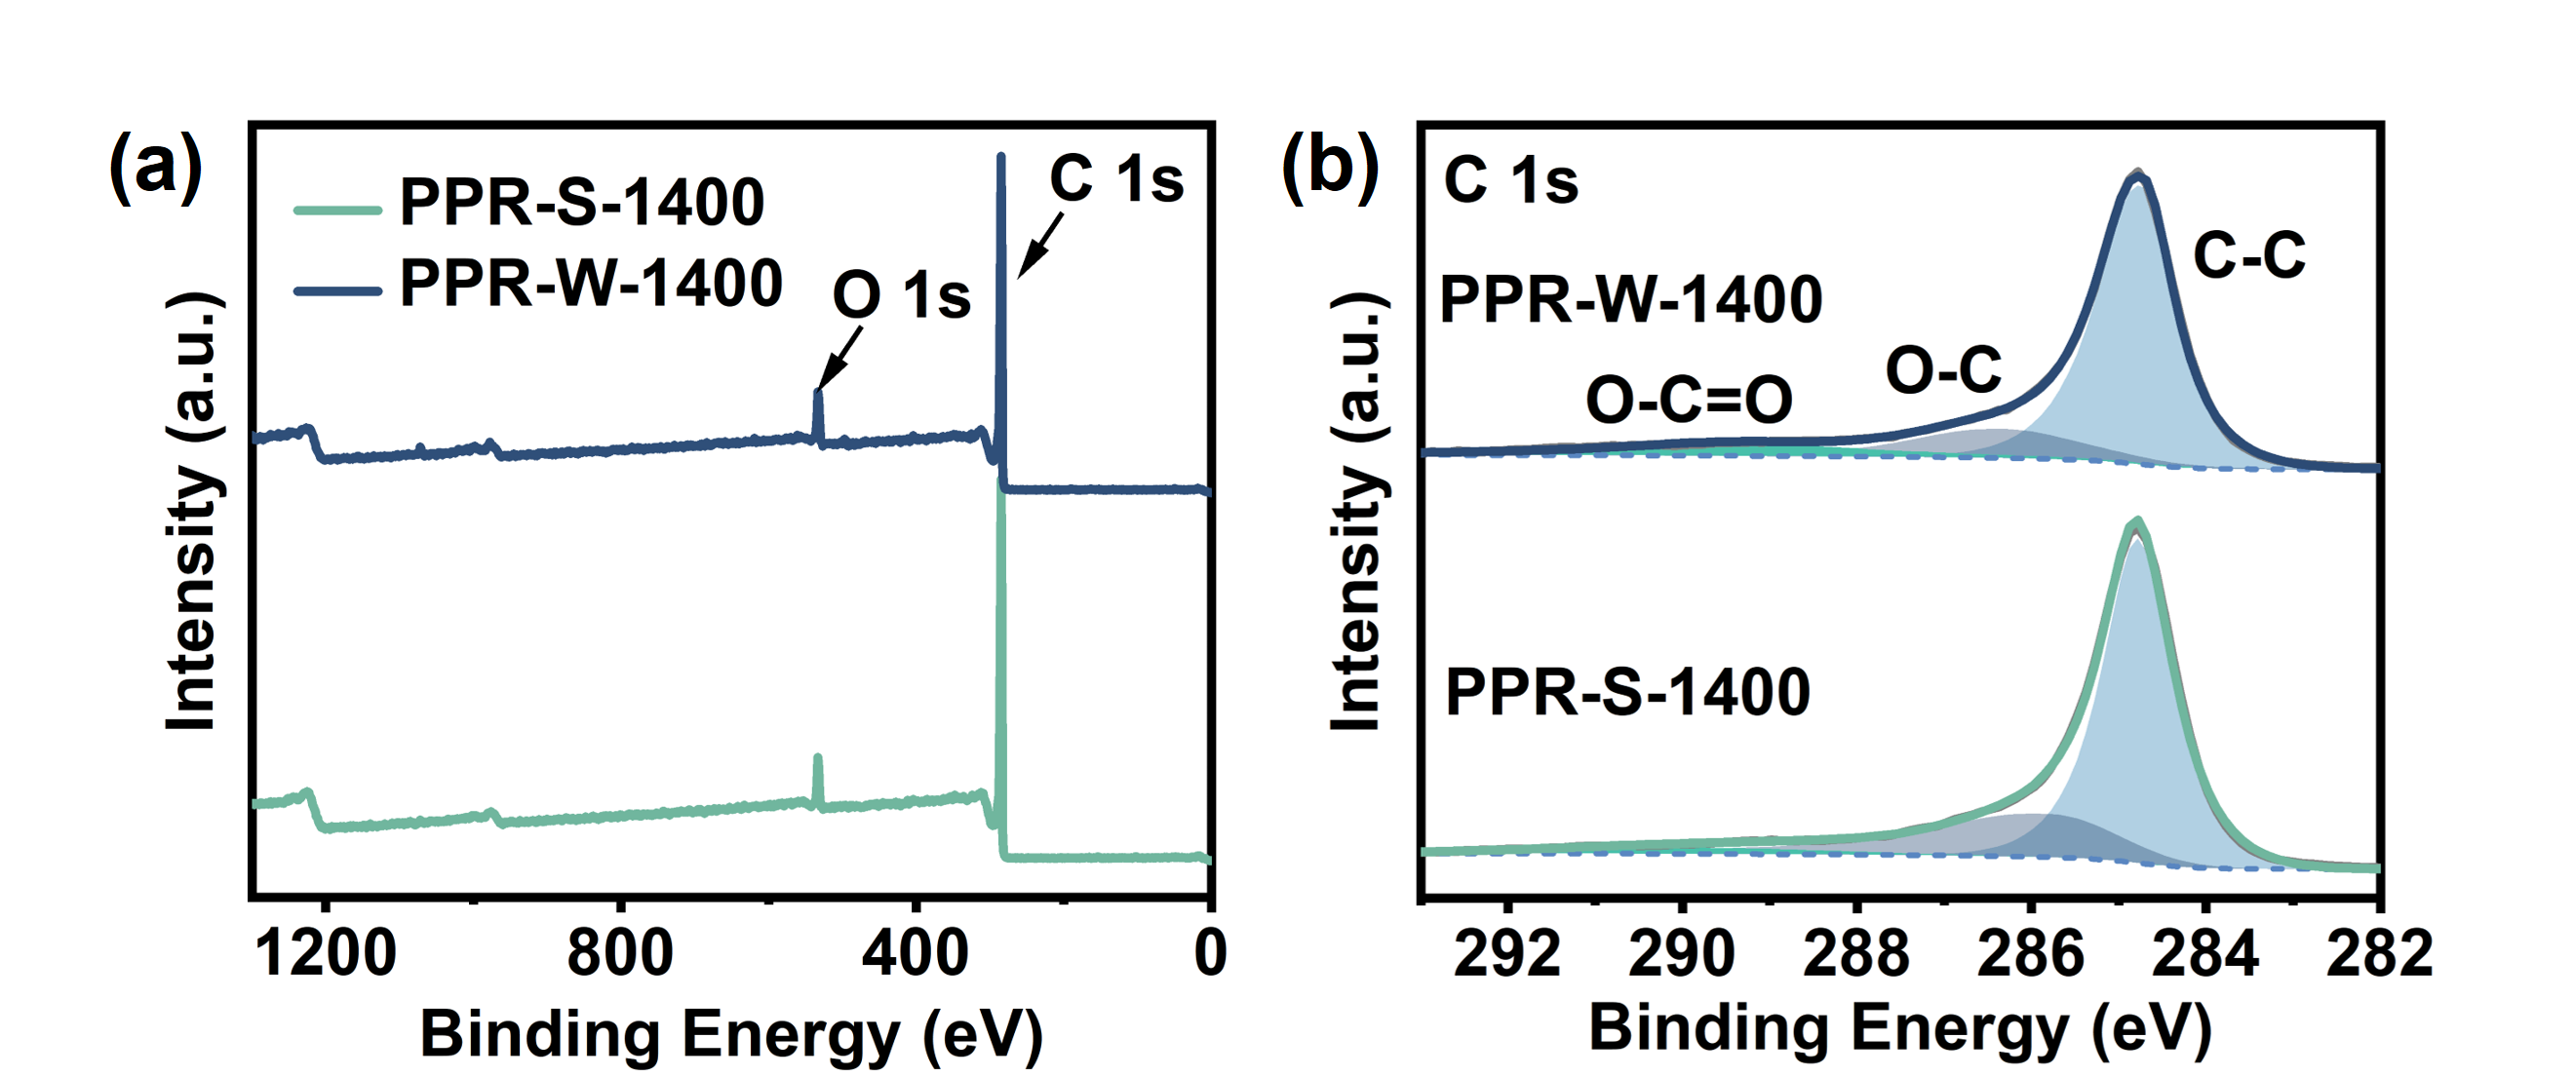


**Supplementary Fig. 16** (a) XPS full spectra and (b) High-resolution C 1s XPS spectra of PPR-W-1400 and PPR-S-1400 anodes.


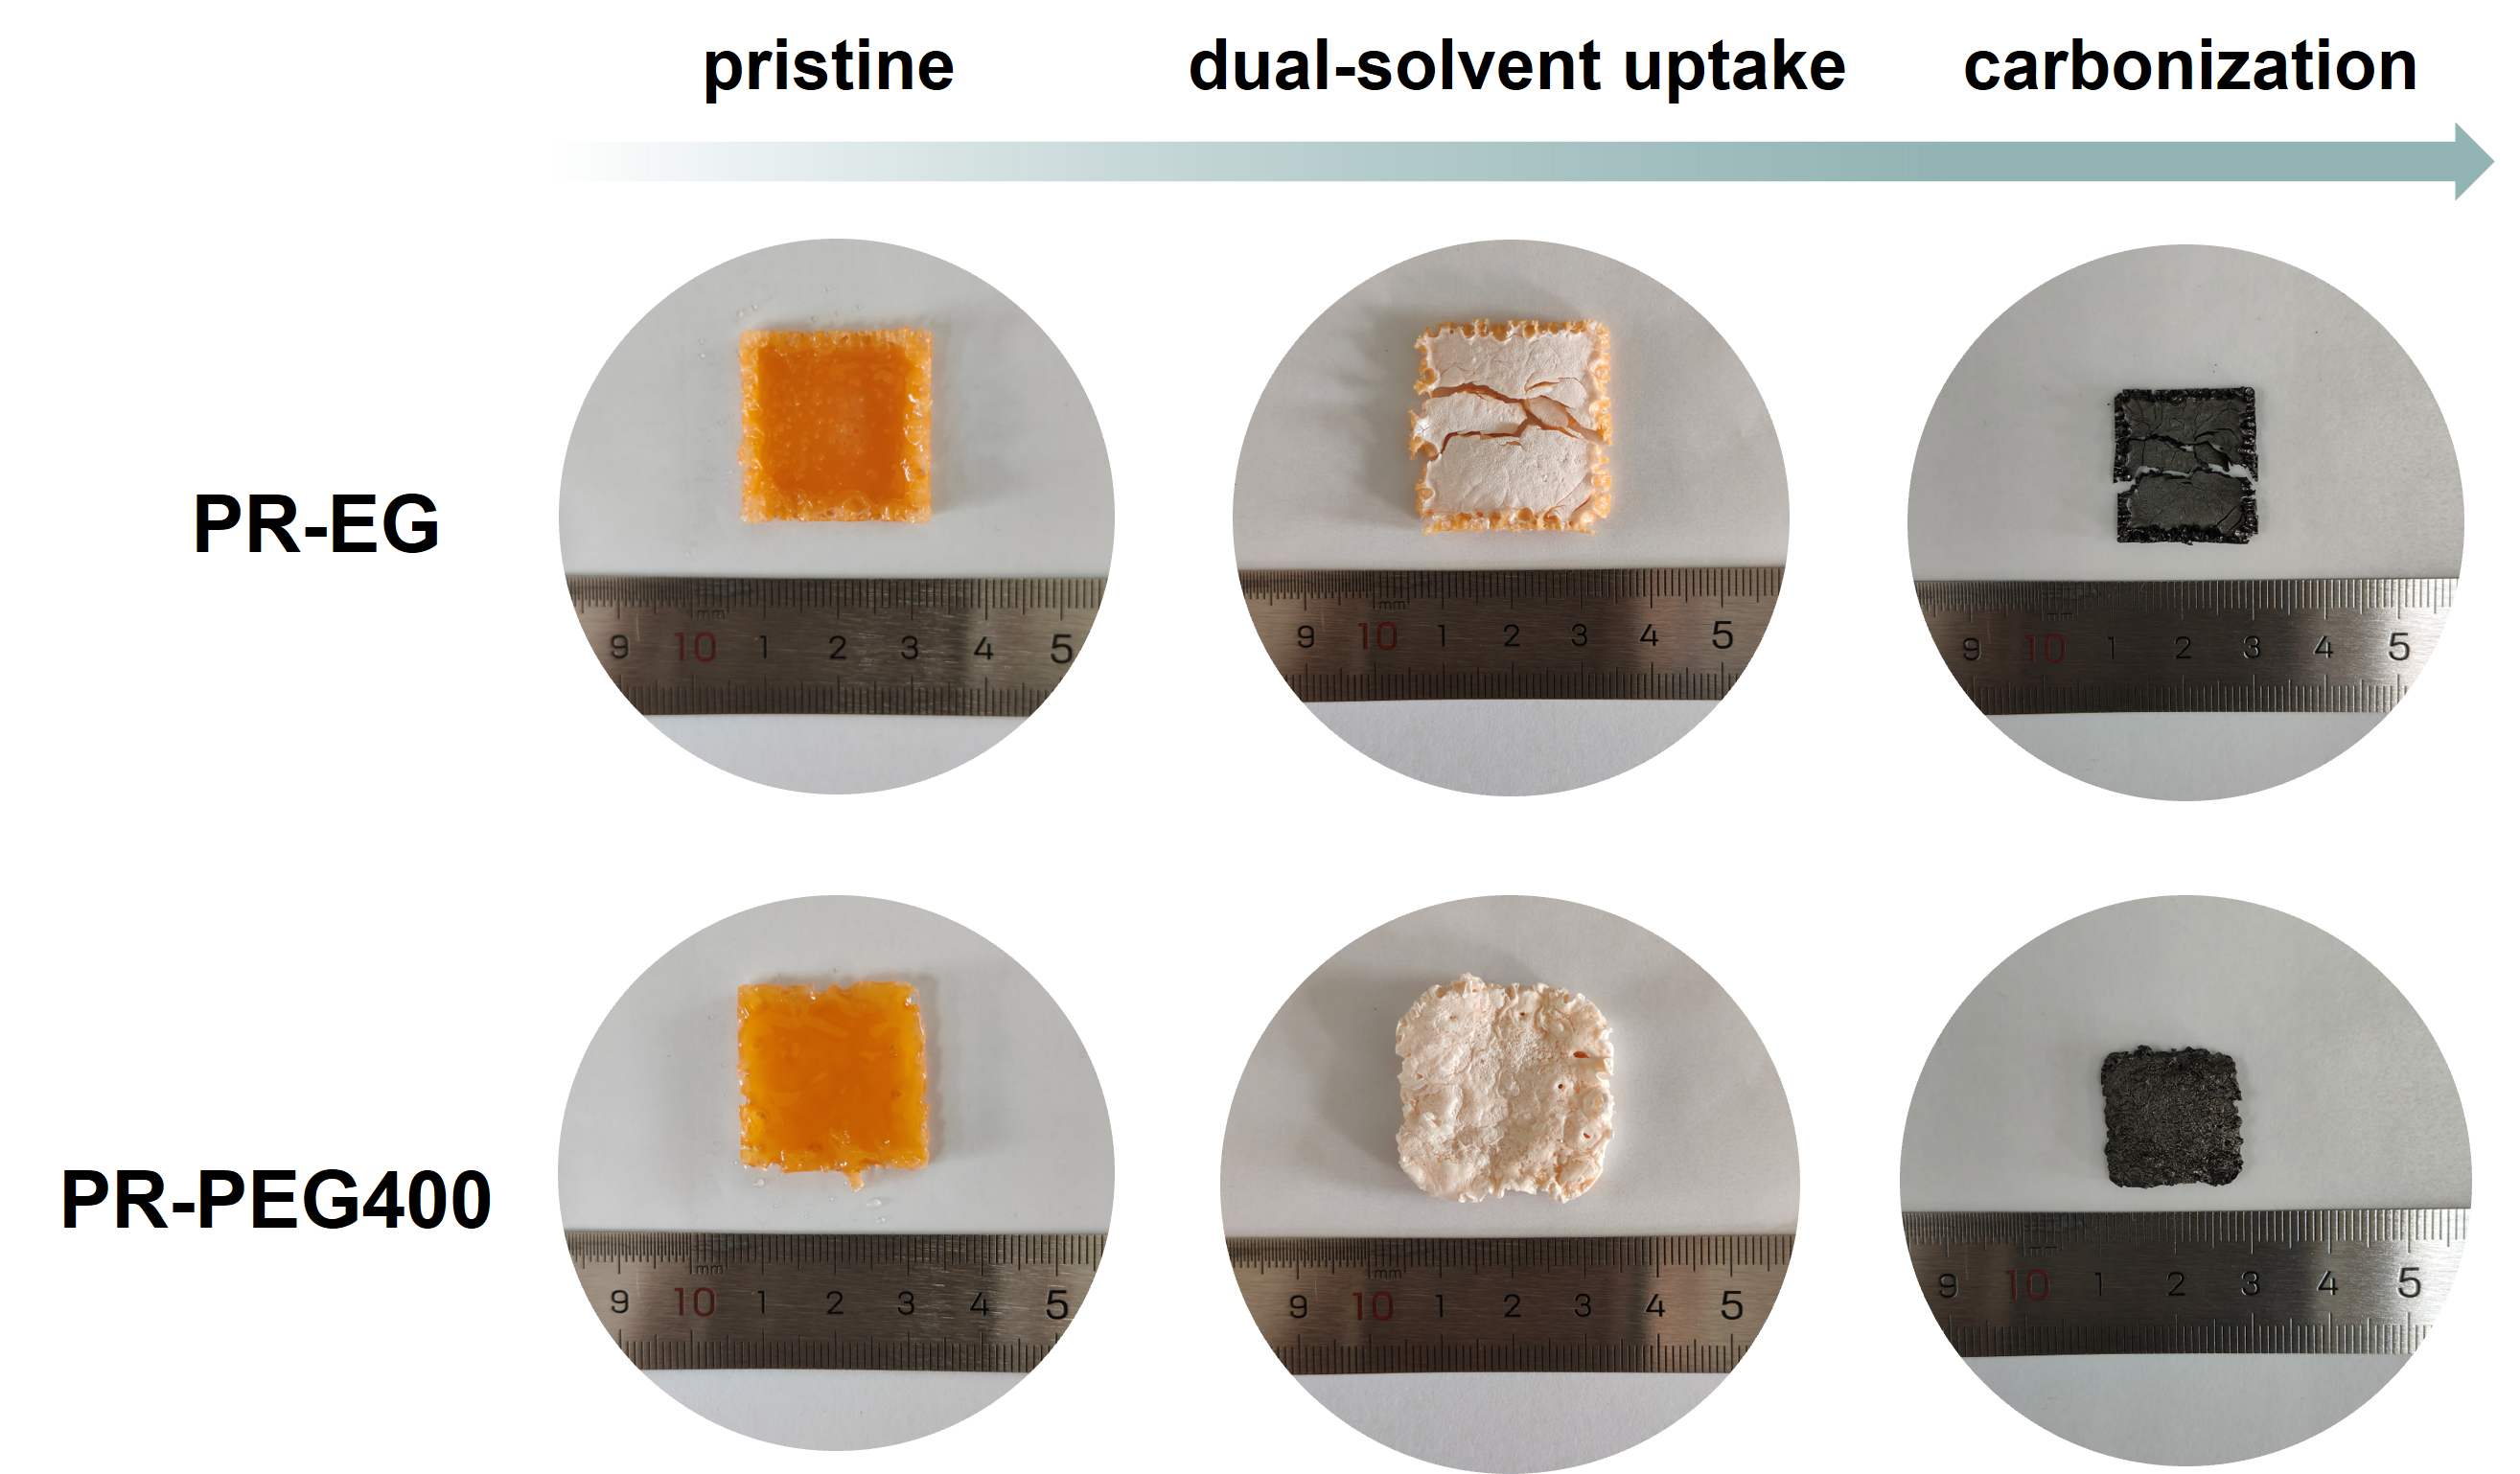


**Supplementary Fig. 17** Photographs of the PR-EG and PR-PEG400 aggregates with the dual-solvent uptake and carbonization process.


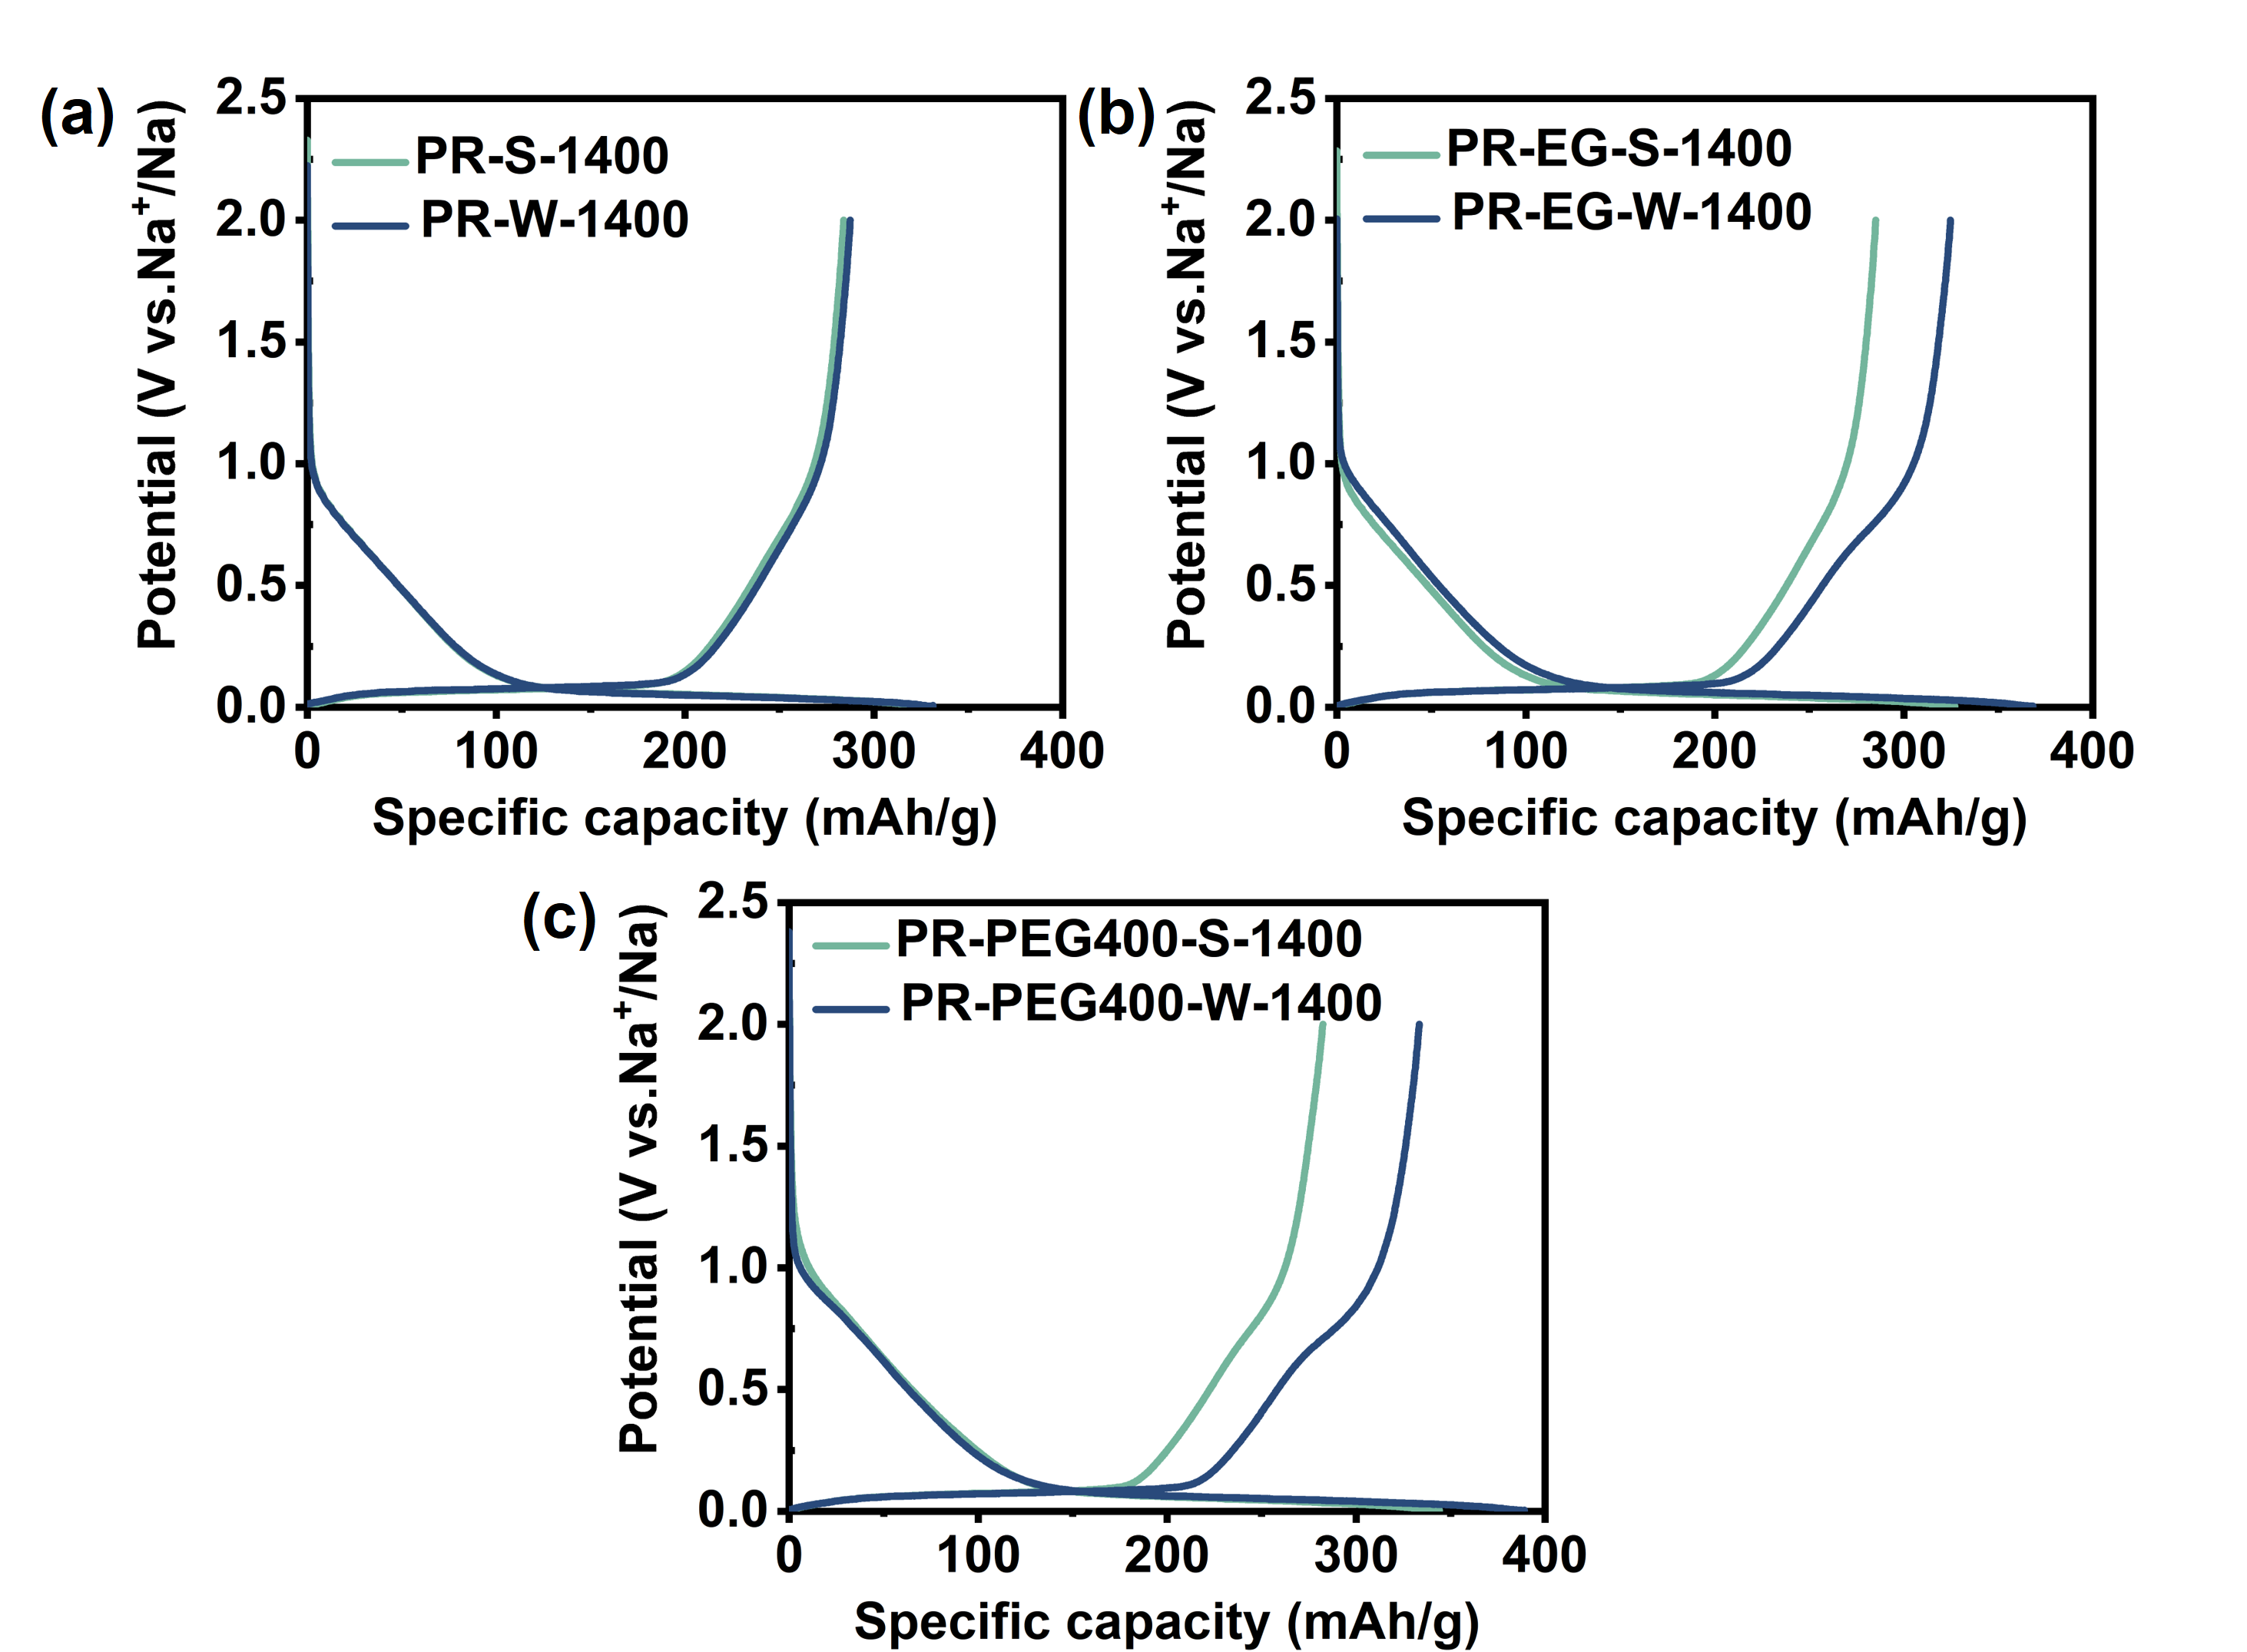


**Supplementary Fig. 18** The initial discharge/charge curves of HC samples derived from strongly and weakly aggregated state in PR, PR-EG and PR-PEG400 systems.


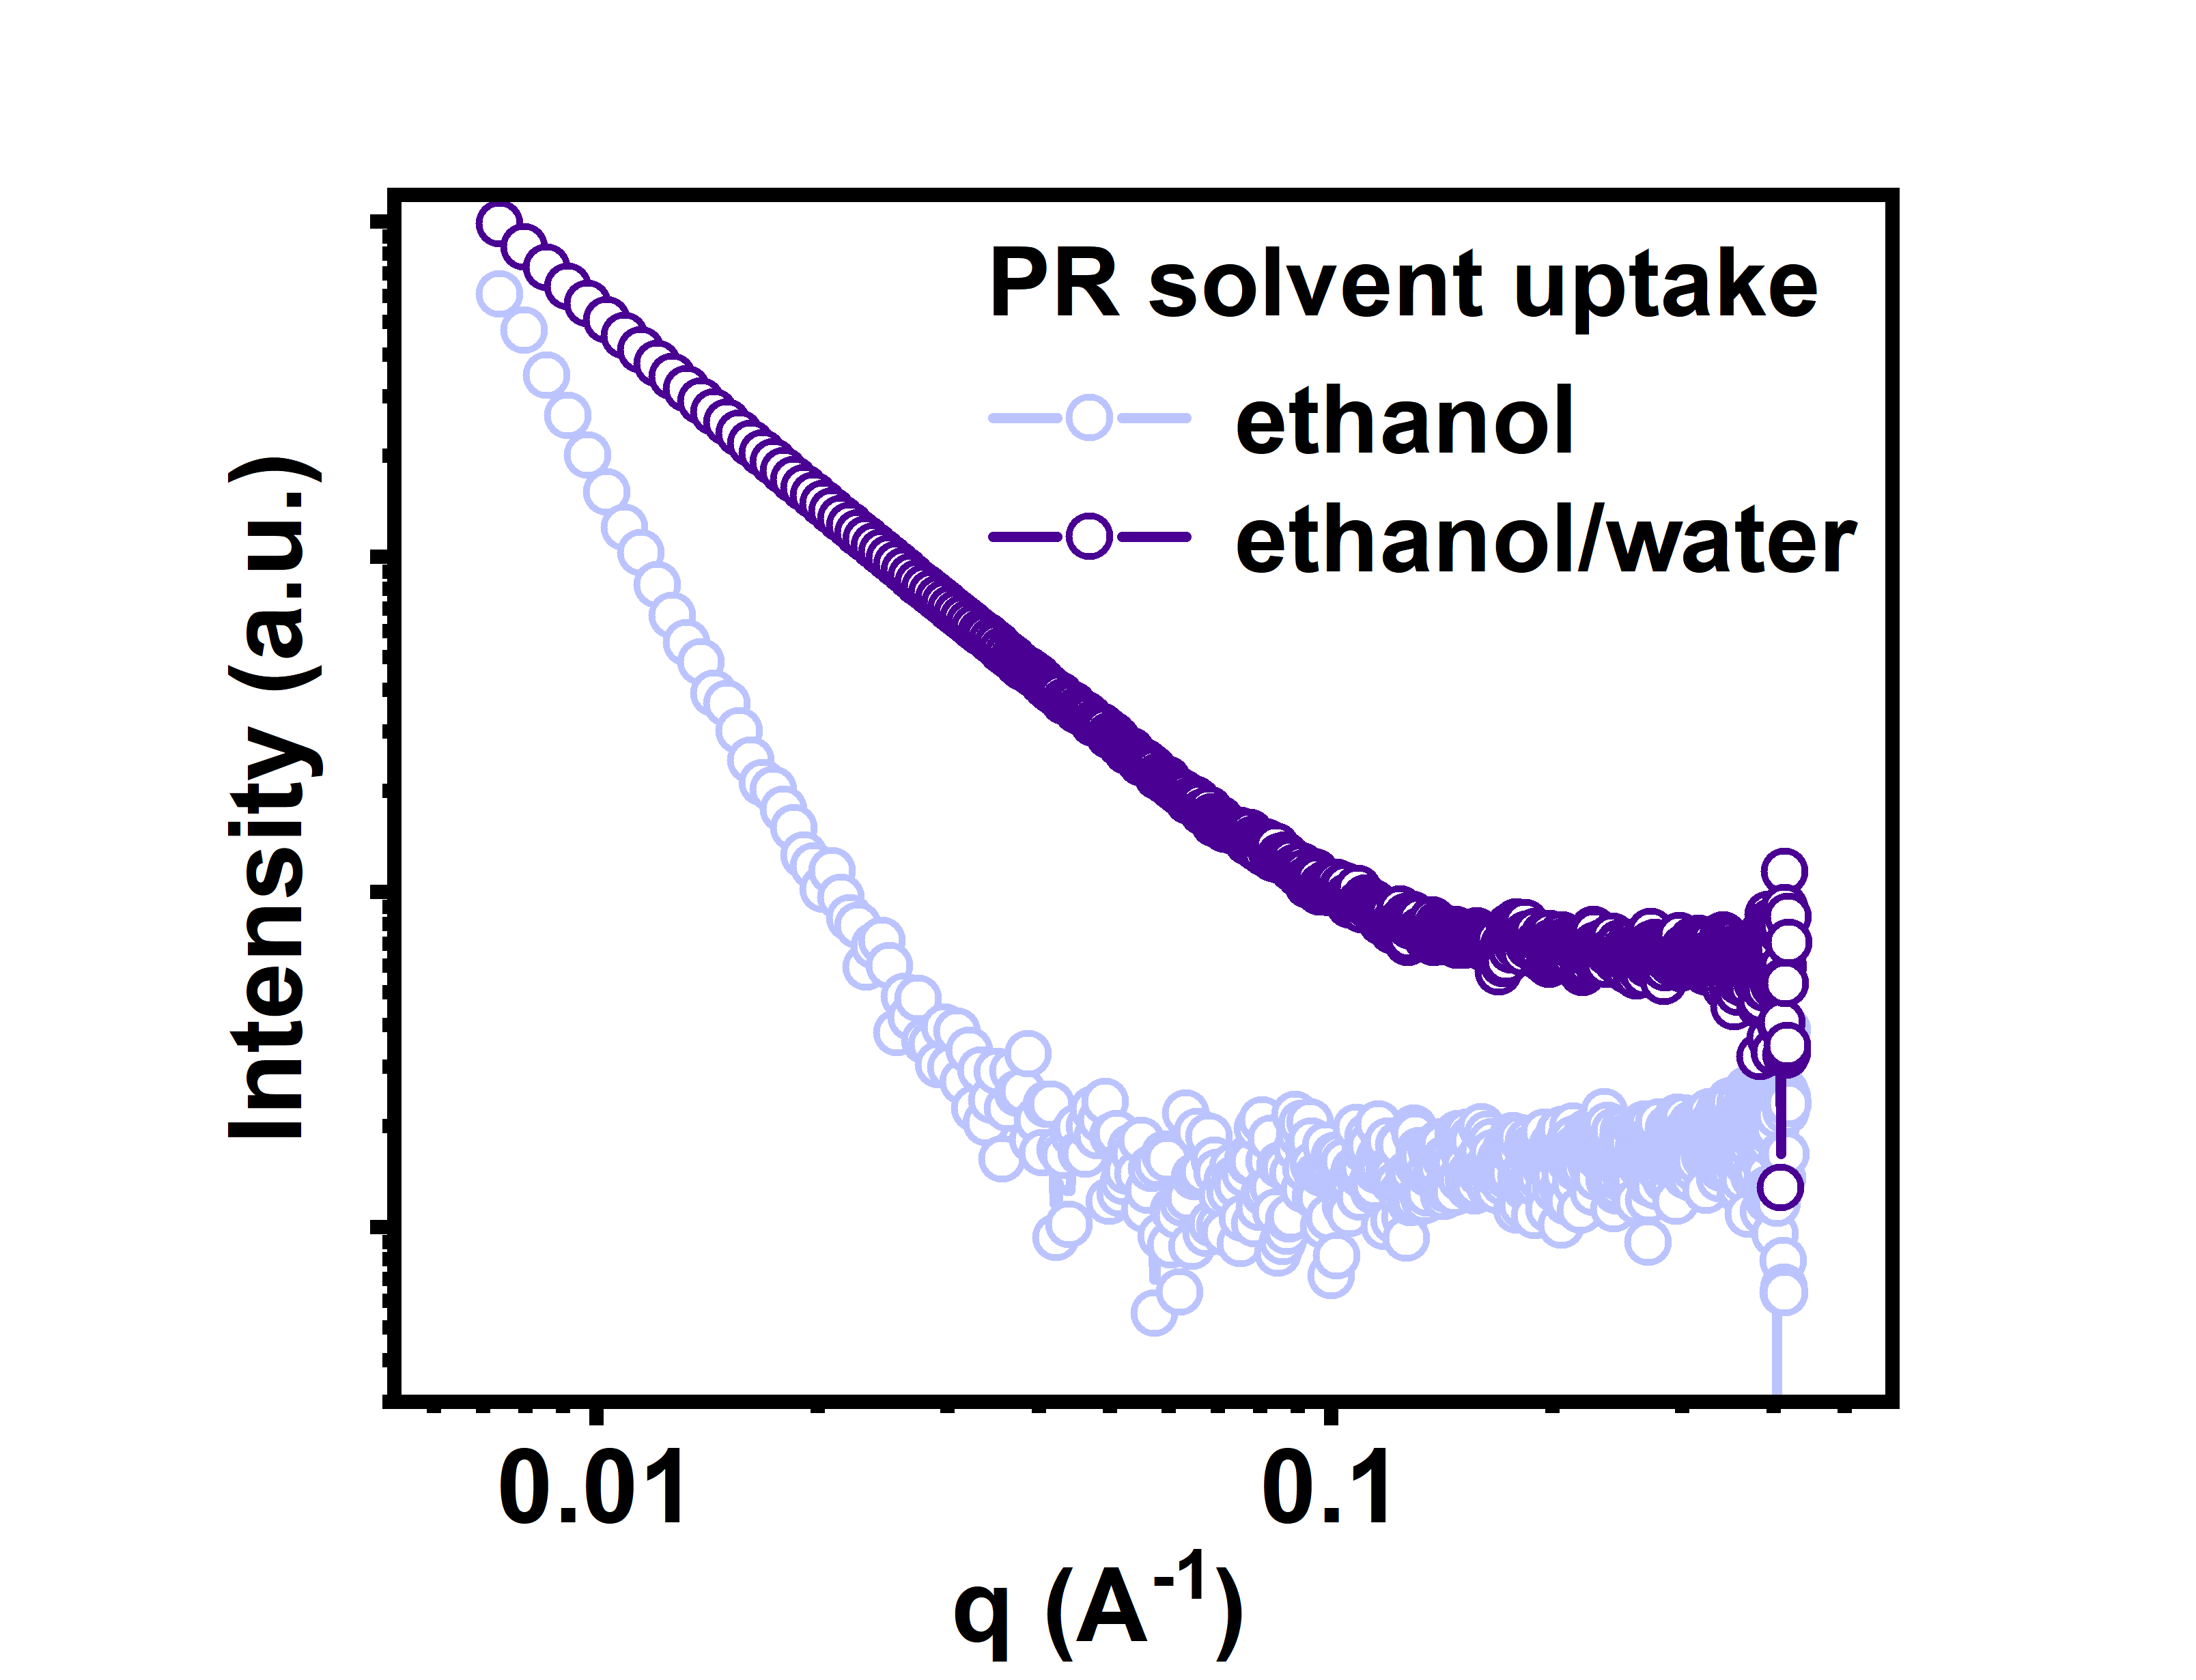


**Supplementary Fig. 19** SAXS patterns of PR aggregates after only ethanol or ethanol/water dual-solvent immersion.


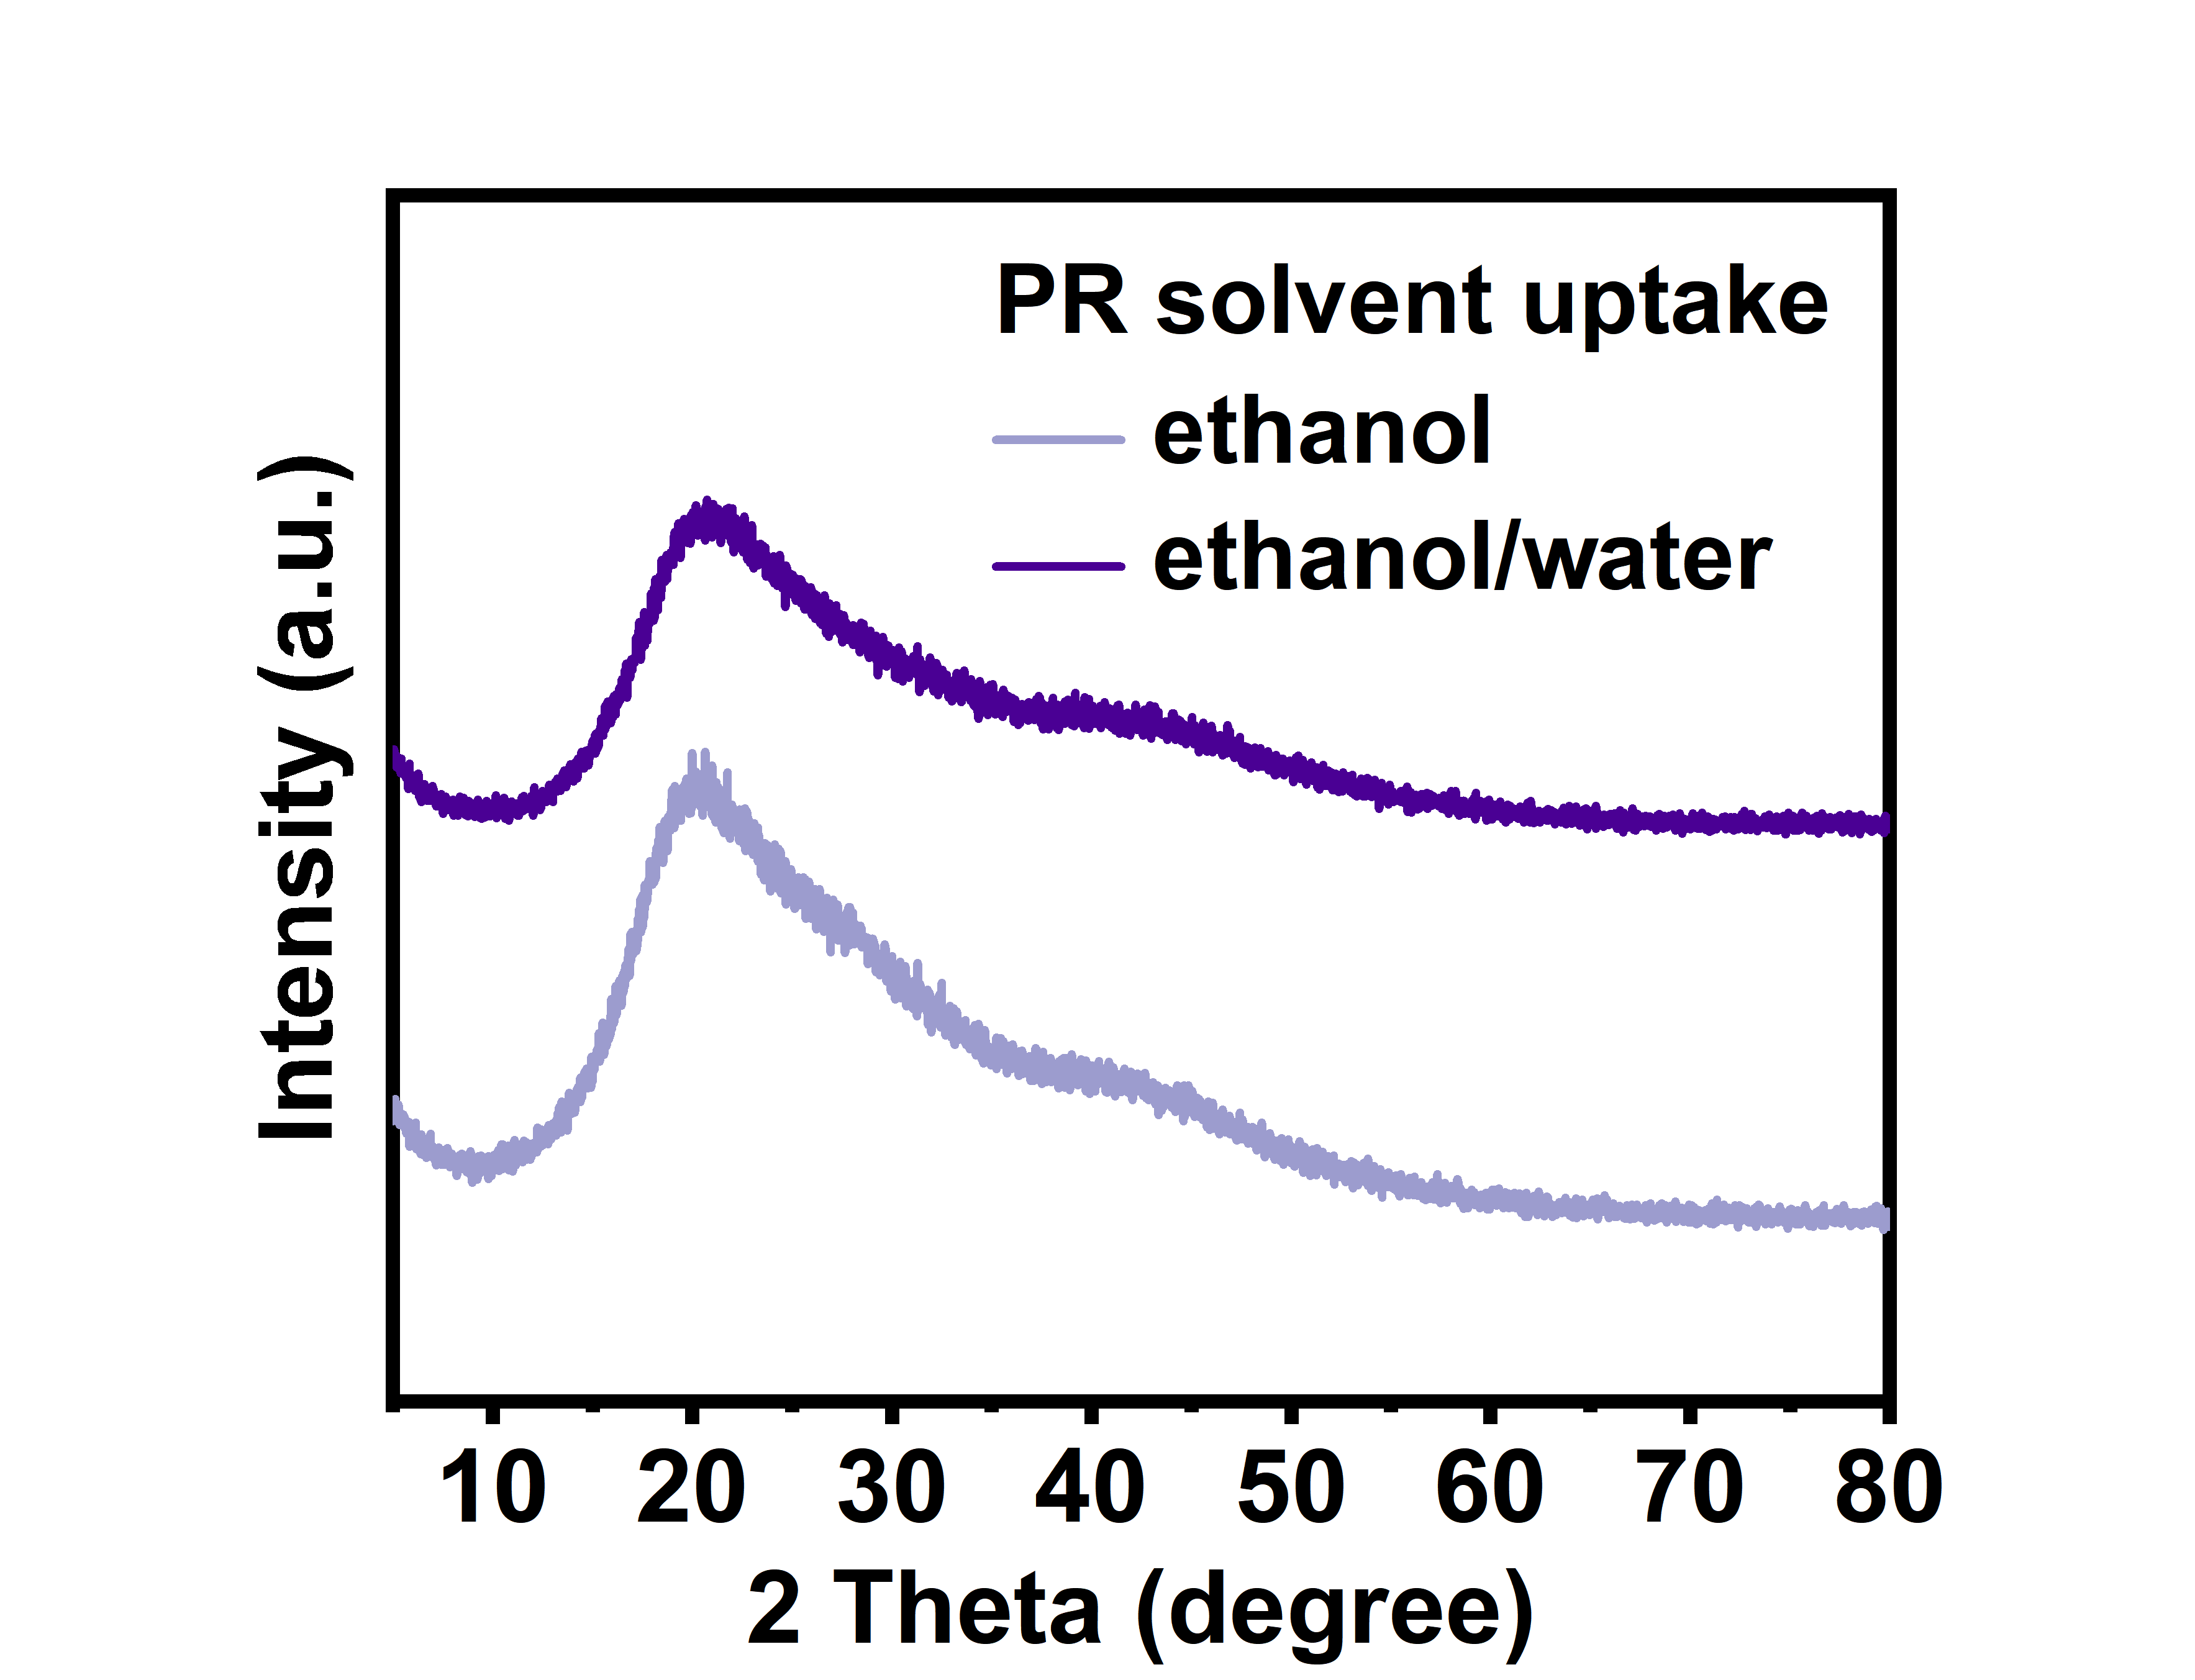


**Supplementary Fig. 20** XRD patterns of PR aggregates after only ethanol or ethanol/water dual-solvent immersion.


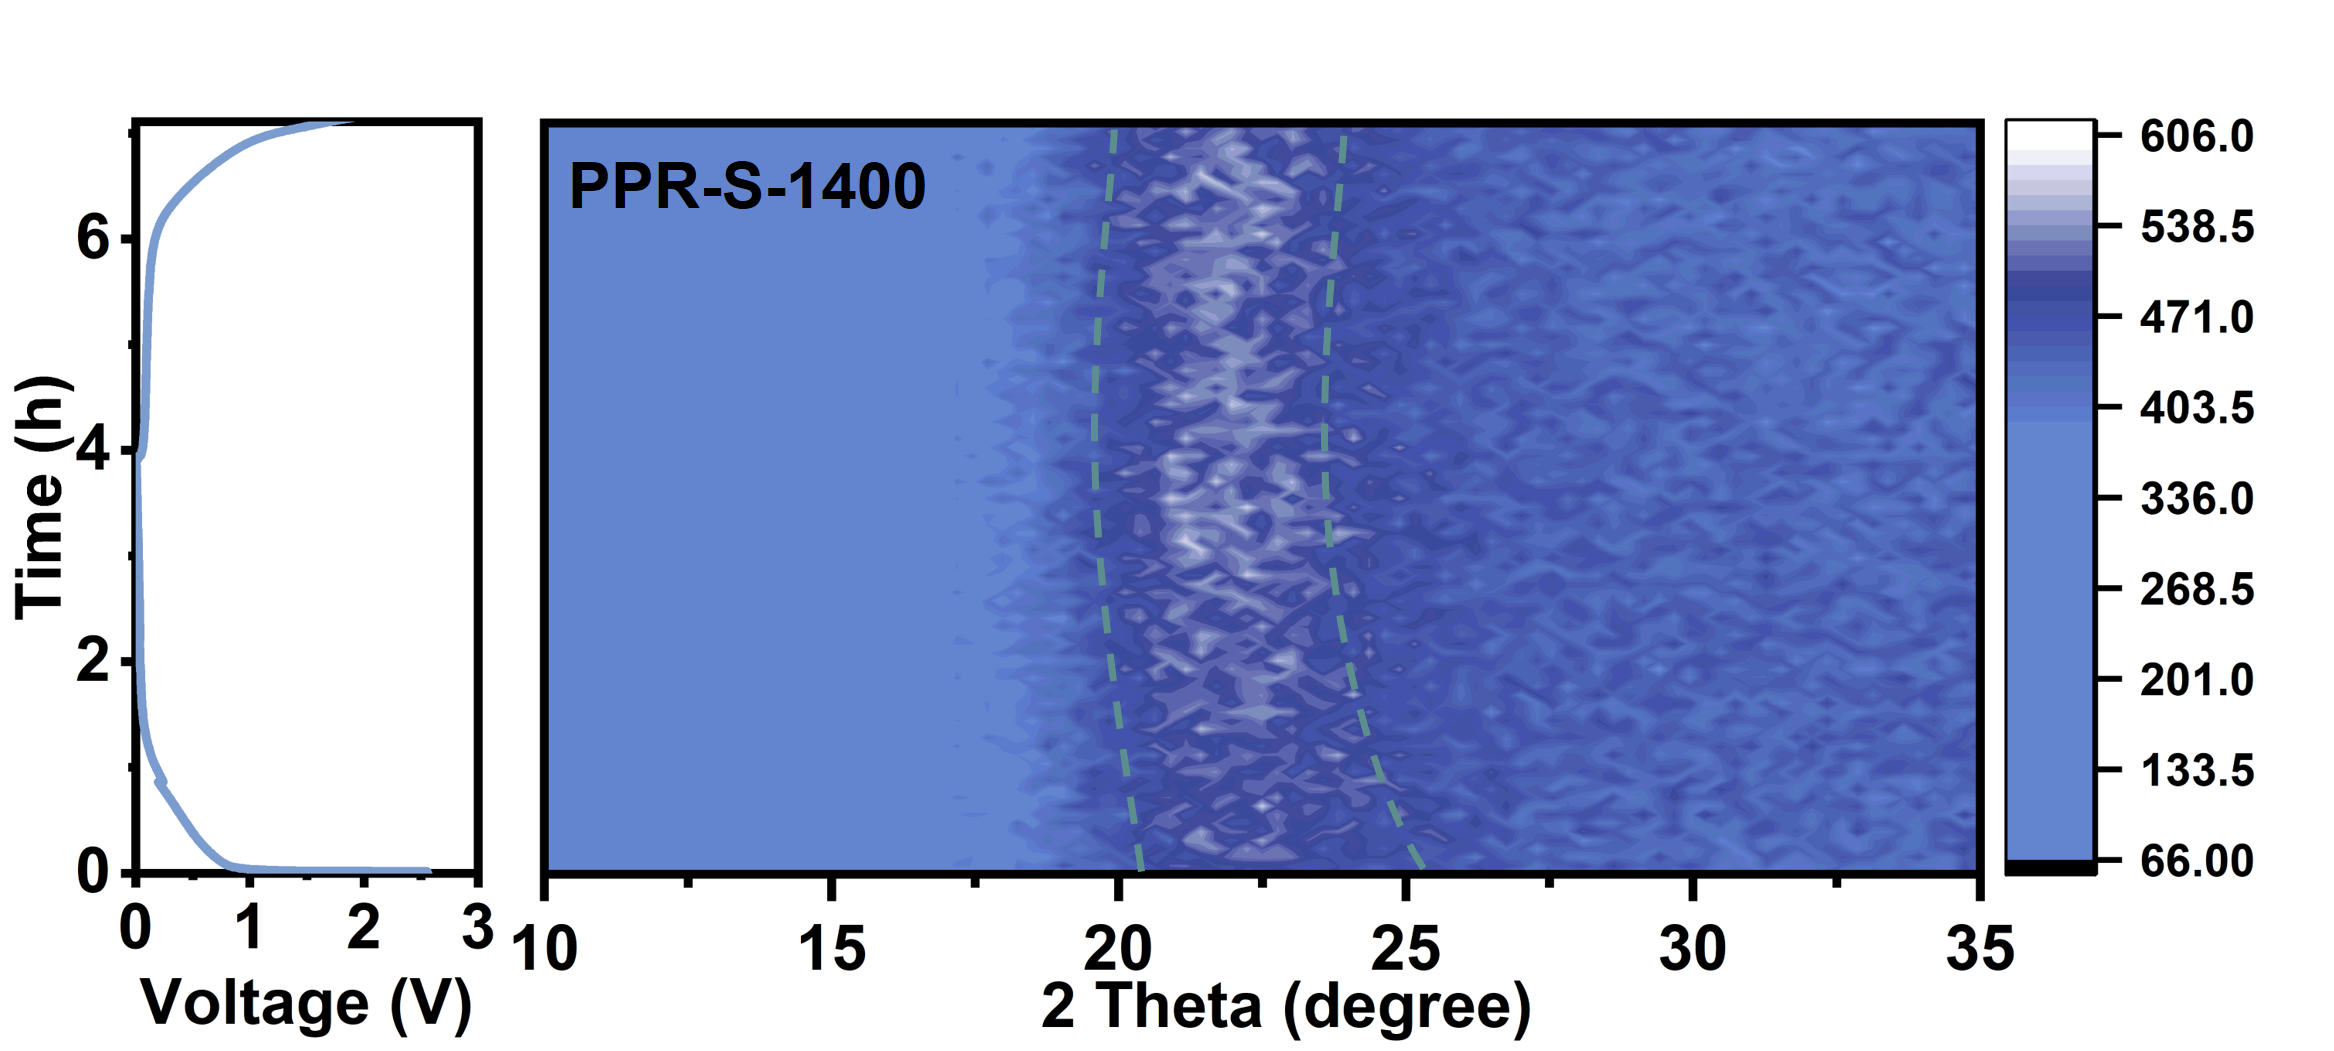


**Supplementary Fig. 21** In-situ XRD spectra of PPR-S-1400 anode.


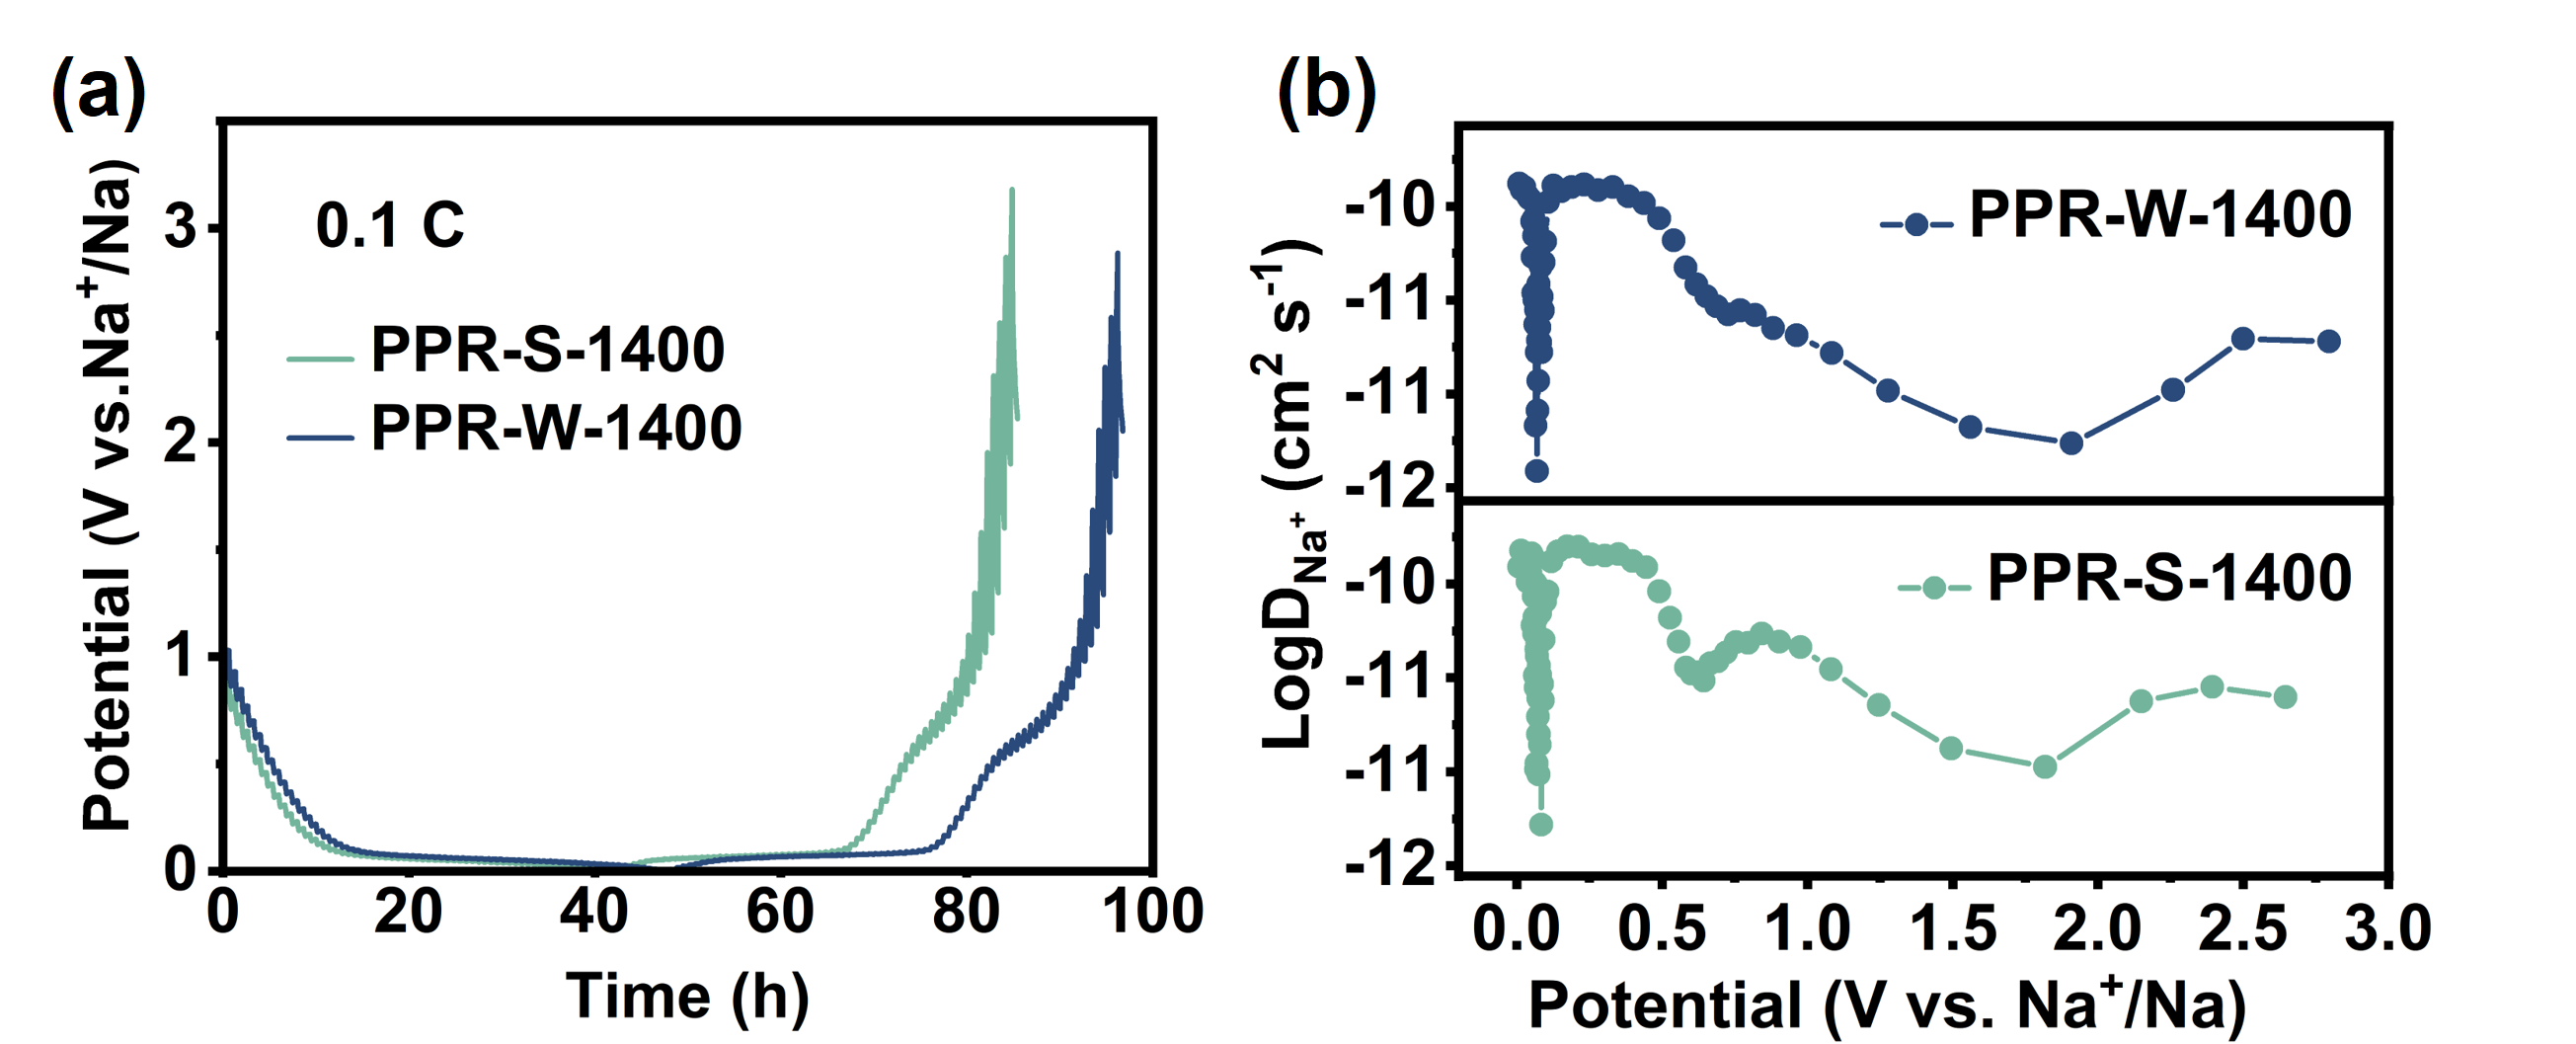


**Supplementary Fig. 22** (a) GITT curves and (b) Na+ diffusion coefficients at de-sodiation process estimated from GITT curves of PPR-W-1400 and PPR-S-1400 anodes.


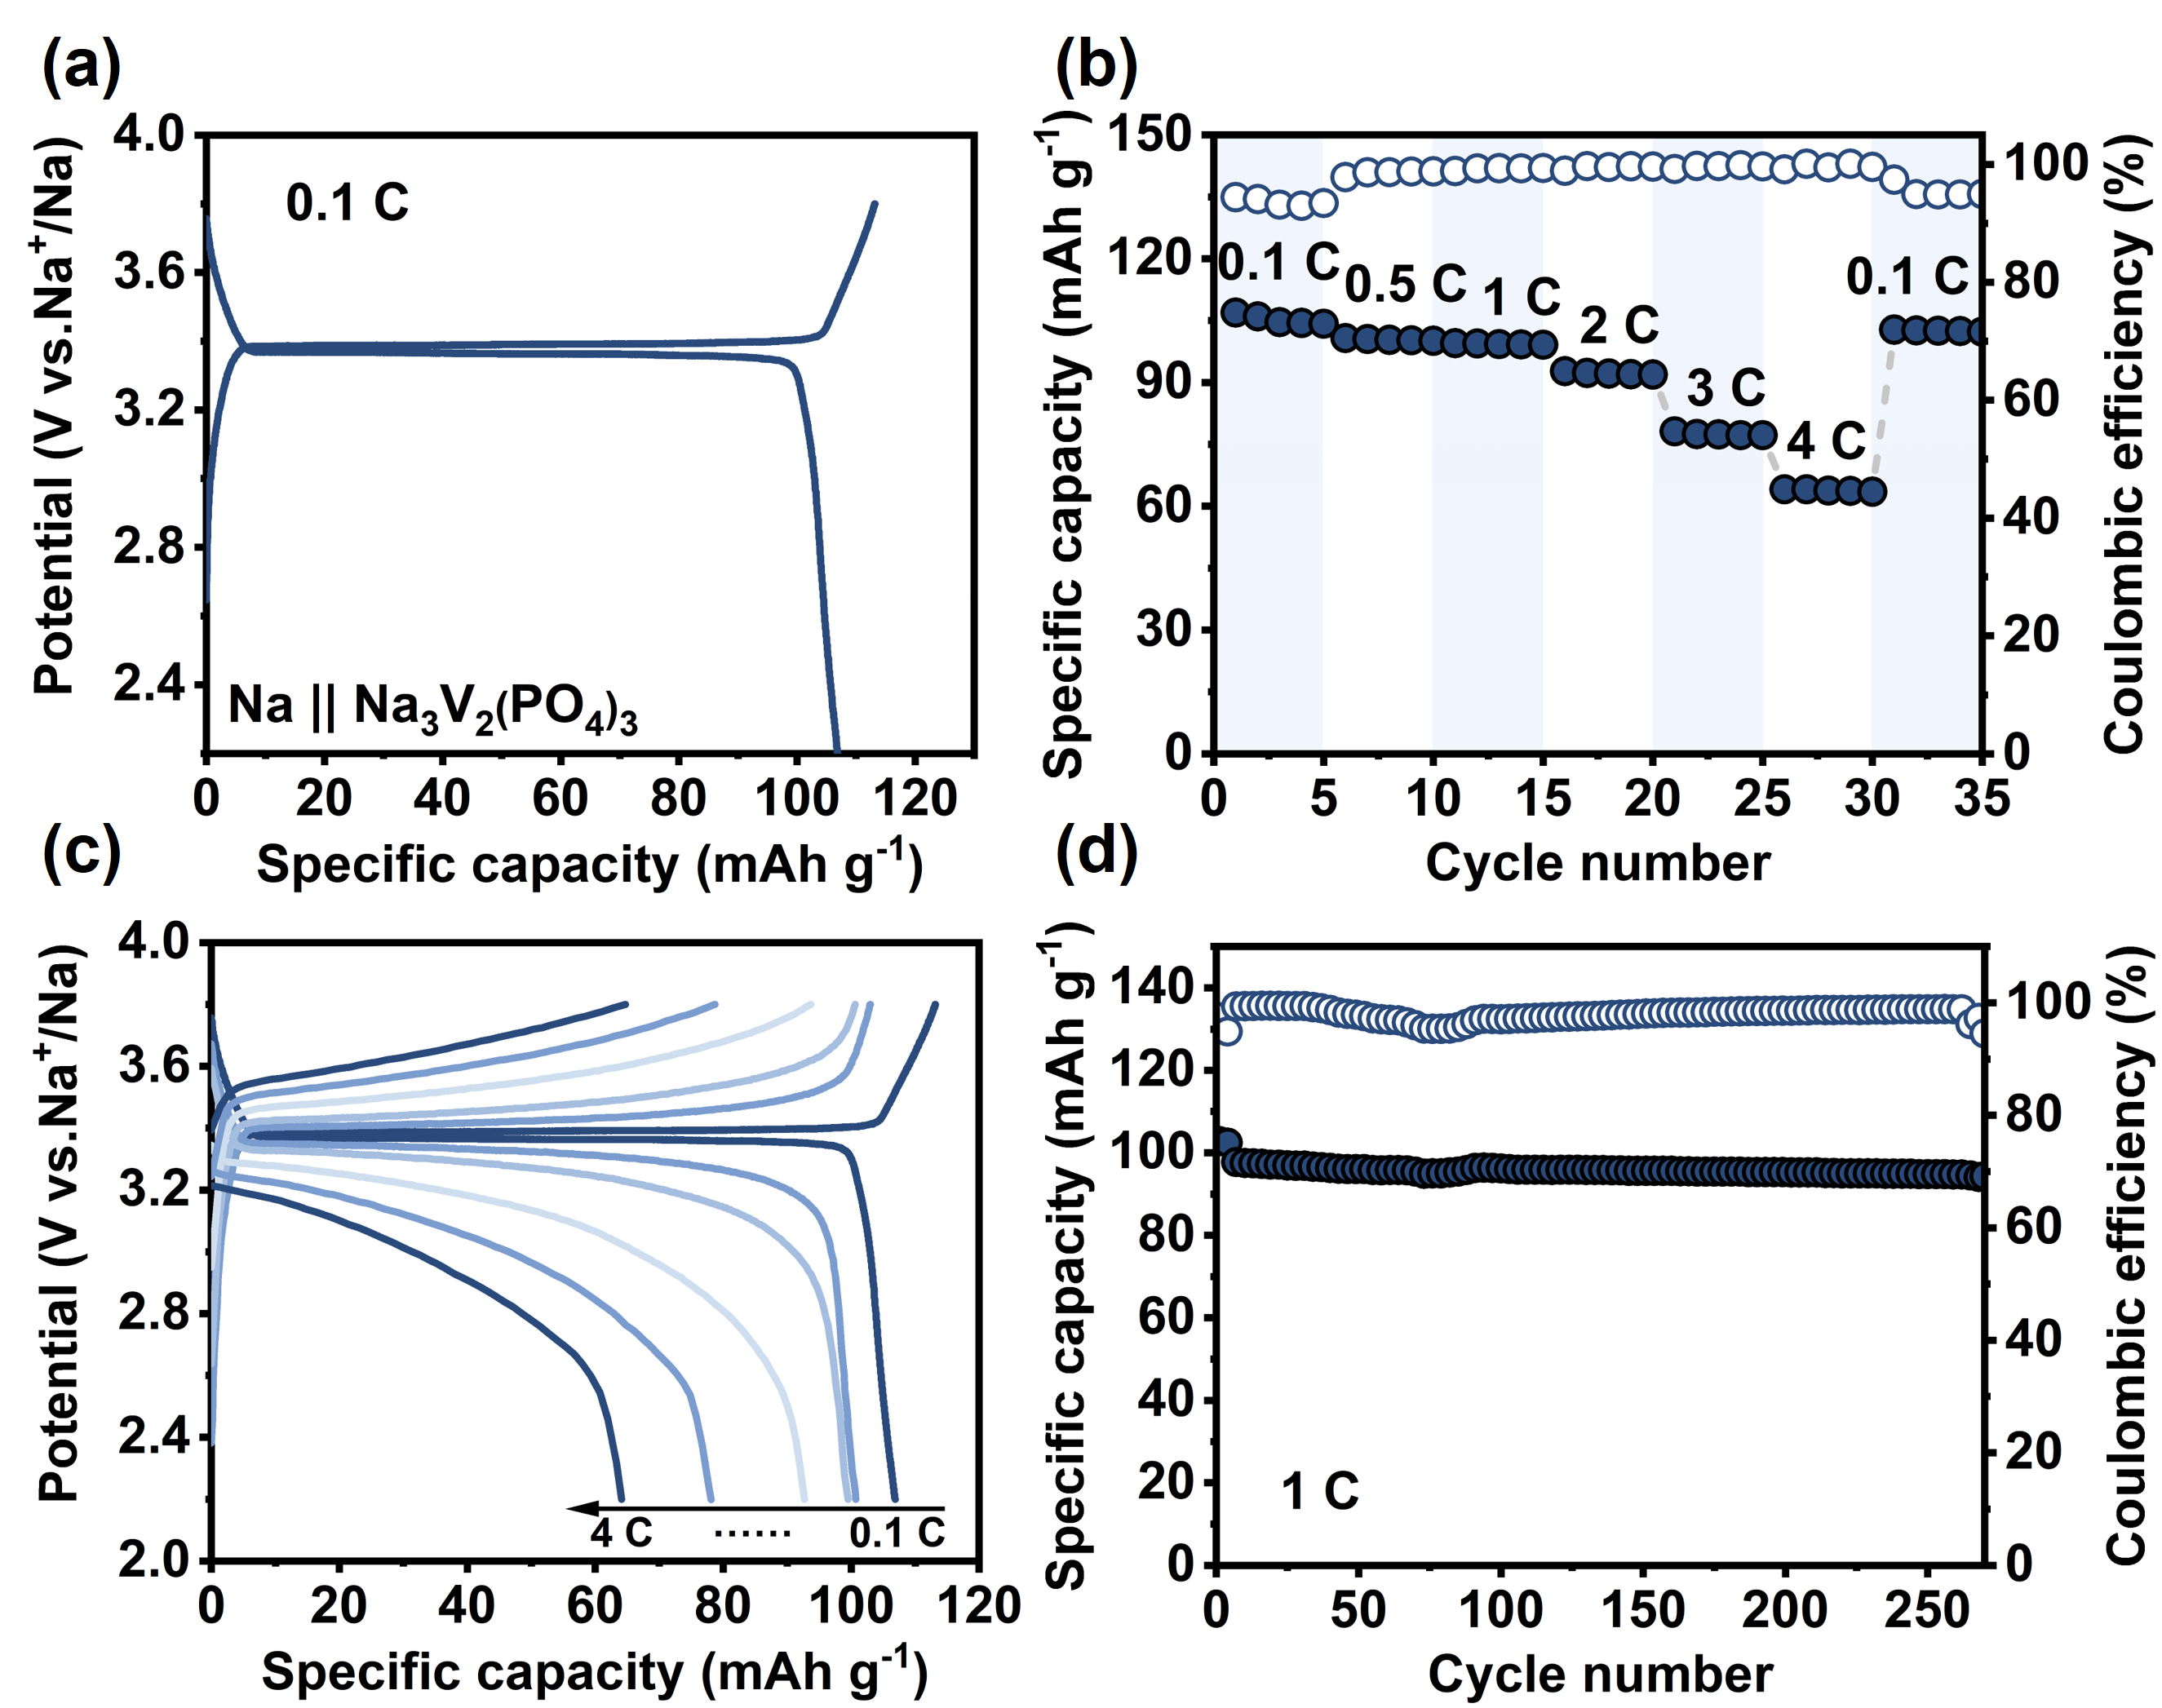


**Supplementary Fig. 23** Electrochemical performance of NVP cathode. (a) Initial charge/discharge curve at 0.1 C; (b) Rate performance; (c) Charge/discharge curves at different rate; (d) Cycling performance at 1 C.

**Supplementary Table S1.** Positron lifetime distributions in PPR-S and PPR-W precursor

| **Samples** | **Lifetimes (ns)** | | | **Intensities (%)** | | | **Free volume radius (Å)** | **Free volume size (Å3)** | **Fractional free volume** |
| --- | --- | --- | --- | --- | --- | --- | --- | --- | --- |
| **τ1** | **τ2** | **τ3** | **I1** | **I2** | **I3** |
| PPR-W | 0.17 | 0.36 | 1.48 | 10.2 | 72.0 | 19.6 | 2.311 | 51.698 | 0.015 |
| PPR-S | 0.32 | 0.45 | 1.29 | 61.7 | 31.9 | 8.5 | 2.091 | 38.295 | 0.005 |
